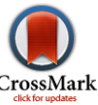

# The db/db Mouse: A Useful Model for the Study of Diabetic Retinal Neurodegeneration

Patricia Bogdanov<sup>1,2,3</sup>, Lidia Corraliza<sup>1,2,3</sup>, Josep A. Villena<sup>2,3</sup>, Andrea R. Carvalho<sup>4,5</sup>, José García-Arumí<sup>4,5</sup>, David Ramos<sup>6</sup>, Jesús Ruberte<sup>6</sup>, Rafael Simó<sup>1,2</sup>, Cristina Hernández<sup>1,2\*</sup>

**1** Diabetes and Metabolism Research Unit, Vall d'Hebron Research Institute, Universitat Autònoma de Barcelona, Barcelona, Spain, **2** Centro de Investigación Biomédica en Red de Diabetes y Enfermedades Metabólicas Asociadas (CIBERDEM), Instituto de Salud Carlos III (ISCIII), Madrid, Spain, **3** Laboratory of Metabolism and Obesity, Vall d'Hebron Research Institute, Universitat Autònoma de Barcelona, Spain, **4** Ophthalmologic Research Laboratory, Vall d'Hebron Research Institute, Universitat Autònoma de Barcelona, Barcelona, Spain, **5** Red Temática de Investigación en Oftalmología (OFTARED), Instituto de Salud Carlos III (ISCIII), Madrid, Spain, **6** Department of Animal Health and Anatomy, Faculty of Veterinary Sciences, Universitat Autònoma de Barcelona, Barcelona, Spain

## Abstract

**Background:** To characterize the sequential events that are taking place in retinal neurodegeneration in a murine model of spontaneous type 2 diabetes (db/db mouse).

**Methods:** C57BLKsJ-db/db mice were used as spontaneous type 2 diabetic animal model, and C57BLKsJ-db/+ mice served as the control group. To assess the chronological sequence of the abnormalities the analysis was performed at different ages (8, 16 and 24 weeks). The retinas were evaluated in terms of morphological and functional abnormalities [electroretinography (ERG)]. Histological markers of neurodegeneration (glial activation and apoptosis) were evaluated by immunohistochemistry. In addition glutamate levels and glutamate/aspartate transporter (GLAST) expression were assessed. Furthermore, to define gene expression changes associated with early diabetic retinopathy a transcriptome analysis was performed at 8 week. Furthermore, an additional interventional study to lower blood glucose levels was performed.

**Results:** Glial activation was higher in diabetic than in non diabetic mice in all the stages ( $p < 0.01$ ). In addition, a progressive loss of ganglion cells and a significant reduction of neuroretinal thickness were also observed in diabetic mice. All these histological hallmarks of neurodegeneration were less pronounced at week 8 than at week 16 and 24. Significant ERG abnormalities were present in diabetic mice at weeks 16 and 24 but not at week 8. Moreover, we observed a progressive accumulation of glutamate in diabetic mice associated with an early downregulation of GLAST. Morphological and ERG abnormalities were abrogated by lowering blood glucose levels. Finally, a dysregulation of several genes related to neurotransmission and oxidative stress such as UCP2 were found at week 8.

**Conclusions:** Our results suggest that db/db mouse reproduce the features of the neurodegenerative process that occurs in the human diabetic eye. Therefore, it seems an appropriate model for investigating the underlying mechanisms of diabetes-induced retinal neurodegeneration and for testing neuroprotective drugs.

**Citation:** Bogdanov P, Corraliza L, Villena JA, Carvalho AR, García-Arumí J, et al. (2014) The db/db Mouse: A Useful Model for the Study of Diabetic Retinal Neurodegeneration. PLoS ONE 9(5): e97302. doi:10.1371/journal.pone.0097302

**Editor:** Alan Stitt, Queen's University Belfast, United Kingdom

**Received:** October 30, 2013; **Accepted:** April 17, 2014; **Published:** May 16, 2014

**Copyright:** © 2014 Bogdanov et al. This is an open-access article distributed under the terms of the Creative Commons Attribution License, which permits unrestricted use, distribution, and reproduction in any medium, provided the original author and source are credited.

**Funding:** This study was supported by grants from the Ministerio de Ciencia e Innovación (SAF2012-35562), the Ministerio de Economía y Competitividad (PI10/01219; PI13/00603), the European Foundation for the Study of Diabetes (EFSO), and Novo-Nordisk. The funders had no role in study design, data collection and analysis, decision to publish, or preparation of the manuscript.

**Competing Interests:** The authors declare that they received funds from Novo-Nordisk but this does not alter their adherence to all the PLOS ONE policies on sharing data and materials.

\* E-mail: cristina.hernandez@vhir.org

These authors contributed equally to this work.

## Introduction

Diabetic retinopathy (DR) is the most common complication of diabetes and one of the leading causes of preventable blindness [1]. Current treatments for DR are applicable only at advanced stages of the disease and are associated with significant adverse effects [2,3]. Therefore, new pharmacological treatments for the early stages of the disease are needed. However, the mechanisms involved in the onset of DR are still poorly understood.

Emerging evidence suggests that retinal neurodegeneration is an early event in the pathogenesis of DR [4–8] which participates in the microcirculatory abnormalities that occur in DR [9–13]. Consequently, new therapeutic strategies based on neuroprotection have been proposed [14–15].

The experimental model currently used to study retinal neurodegeneration in DR is the rat with streptozotocin-induced diabetes (STZ-DM). However, since STZ is neurotoxic itself [16], a debate has arisen regarding the appropriateness of this model for examining retinal neurodegeneration shortly after STZ adminis-

tration. A second rodent model, the Ins2Akita (Akita) mouse, which contains a dominant point mutation in the gene encoding for insulin-2 that induces spontaneous type 1 diabetes in the B6 mouse strain, reproduces some findings of the neurodegenerative process that occurs in the human diabetic retina [17]. However, both STZ-DM and Akita mouse are models of type 1 diabetes and further characterization of the neurodegenerative process in type 2 models is needed.

In recent years the C57BL/KsJ-*db/db* mouse has been used as a spontaneous diabetic model of type 2 diabetes to investigate the pathogenesis of DR [17–23]. The C57BL/KsJ-*db/db* mouse carries a mutation in the leptin receptor gene and is a well-established model of obesity-induced type 2 diabetes. Several authors have reported the presence of retinal neurodegeneration (apoptosis, glial activation and retinal thinning) in this model [19,22]. Therefore, C57BL/KsJ-*db/db* seems appropriate for investigating the underlying mechanisms of retinal neurodegeneration associated with diabetes and for testing new drugs. However, the characterization of the retinal neurodegenerative process and its functional consequences in *db/db* mice is far from being completed. In addition, whether neurodegeneration can be attributed to genetic factors rather than to diabetes is a question which remains to be elucidated.

In the present study we have characterized the neurodegenerative process that occurs in the retina of C57BL/KsJ-*db/db* mice by examining morphological, biochemical and functional abnormalities in a sequential manner (8, 16, 24 weeks). Moreover, a transcriptomic analysis in 8-week old diabetic mice was performed to identify new potential causative candidates of DR. In addition, we have demonstrated that the neurodegenerative process is significantly arrested after blood glucose levels have been lowered. Overall, our results suggest that C57BL/KsJ-*db/db* reproduces the neurodegenerative features that occur in the human diabetic eye, and is an appropriate experimental model for studying the mechanisms involved in diabetes-induced retinal neurodegeneration.

## Methods

### Animals

A total of 90 C57BL/KsJ-*db/db* male mice obtained from Harlan Laboratories, Inc. were divided into two groups: 45 non-

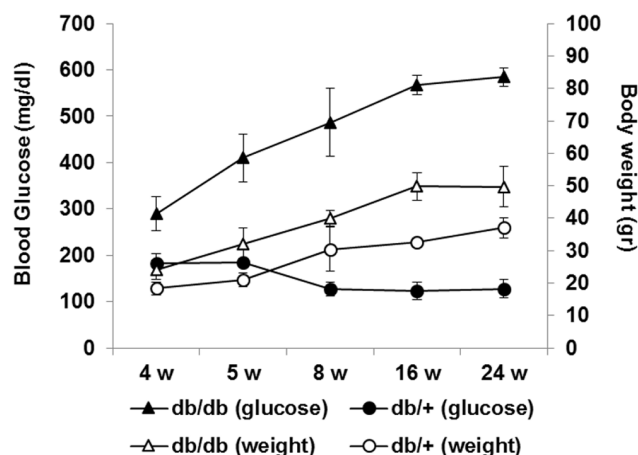

**Figure 1. Blood glucose levels (black marks) and body weight (white marks) in db/+ (circles; n = 12) and db/db mice (triangles; n = 12).** Values are expressed as mean  $\pm$  SD. \* $p < 0.05$ ; \*\* $p < 0.001$ . doi:10.1371/journal.pone.0097302.g001

diabetic (*db/+*) and 45 diabetic mice (*db/db*). To assess the chronological sequence of the retinal abnormalities associated with diabetes, 15 diabetic mice (*db/db*) were compared with 15 age-matched non-diabetic mice (*db/+*) at different ages (8, 16 and 24 weeks). Blood glucose concentrations were measured from the tail vein (glucose assay kit; Abbott). Mice were housed under controlled conditions of temperature (20°C) and humidity (60%) with a 12-hour light/dark cycle and had free access to food and water.

**Interventional study.** Diabetic mice (*db/db*) 8 weeks old received diet *ad libitum* (n = 10) or restrictive diet (normal chow diet restricted to 60% of total daily calories; n = 10) for 15 days. Ten non-diabetic mice matched by age served as control group. At day 15 the animals were euthanized by cervical dislocation and the eyes enucleated.

This study was approved by the Animal Care and Use Committee of VHIR (Vall d'Hebron Research Institute). All the experiments were performed in accordance with the tenets of the European Community (86/609/CEE) and ARVO (Association for Research in Vision and Ophthalmology).

### Electroretinography

Before retinal electrophysiological tests, the animals were dark-adapted (12 hours overnight) and anesthetized under a dim red light with a 2% isoflurane/O<sub>2</sub> mixture. Pupils were dilated with topic 1% tropicamide and ciclopegic was applied on the corneal surface. Full field electroretinography (ERG) recordings were measured using an HMsERG (Ocuscience) with two recording channels. Recordings were measured from corneal electrodes attached to the corneas by a lens embedded in 1% methylcellulose to avoid cornea dehydration. Two needle probes were inserted for reference subcutaneously between each jaw and a grounding probe were inserted into the base of the tail. Then their noses were inserted into a mini Ganzfeld flash photo-stimulator with white LED.

Scotopic ERG stimuli were simultaneously recorded from both eyes of dark-adapted (12–16 hours) mice. Light stimuli were delivered via a Ganzfeld light source with flash intensities from 30 to 30000 mcd.s/m<sup>-2</sup>. Responses were amplified 5000X, high-pass filtered with a 10-Hz cutoff frequency, and low-pass filtered at 300 Hz using an amplifier. The ERG voltage and stimulus-monitor signals were digitalized with hardware (HMsERG) and software (HMsERG View) from Ocuscience. Data were recorded at either 0.2 or 0.5 ms/pt. A stimulus set consisted of 3 to 20 responses at the same wavelength and intensity of light. The oscillatory potentials (OPs) were isolated by a band-pass filtering the retinal response between 34 and 300 Hz. We chose 34 Hz as a cutoff frequency to avoid any loss of signal power, especially for the slower OPs of diabetic animals. OPs were isolated for a light stimulus of 3000 mcd.s/m<sup>-2</sup>.

The amplitude and implicit time of the ERG a- and b-waves were measured at the maximum negative and positive peaks of the recordings with respect to the baseline before stimulation. As recommended by the ISCEV (International Society for Clinical Electrophysiology of Vision) [24] OP amplitudes were measured from the negative peak to the next positive peak whereas OP latencies were measured at the positive peaks. We added up OP amplitudes ( $\Sigma$ OP amplitude) and implicit time ( $\Sigma$ OP implicit time) for the first 5 OPs.

### Tissue Processing

Mice were euthanized by cervical dislocation. The eyes were immediately enucleated and the neuroretina was separated. The neuroretina from one of the eyes was frozen in liquid nitrogen and

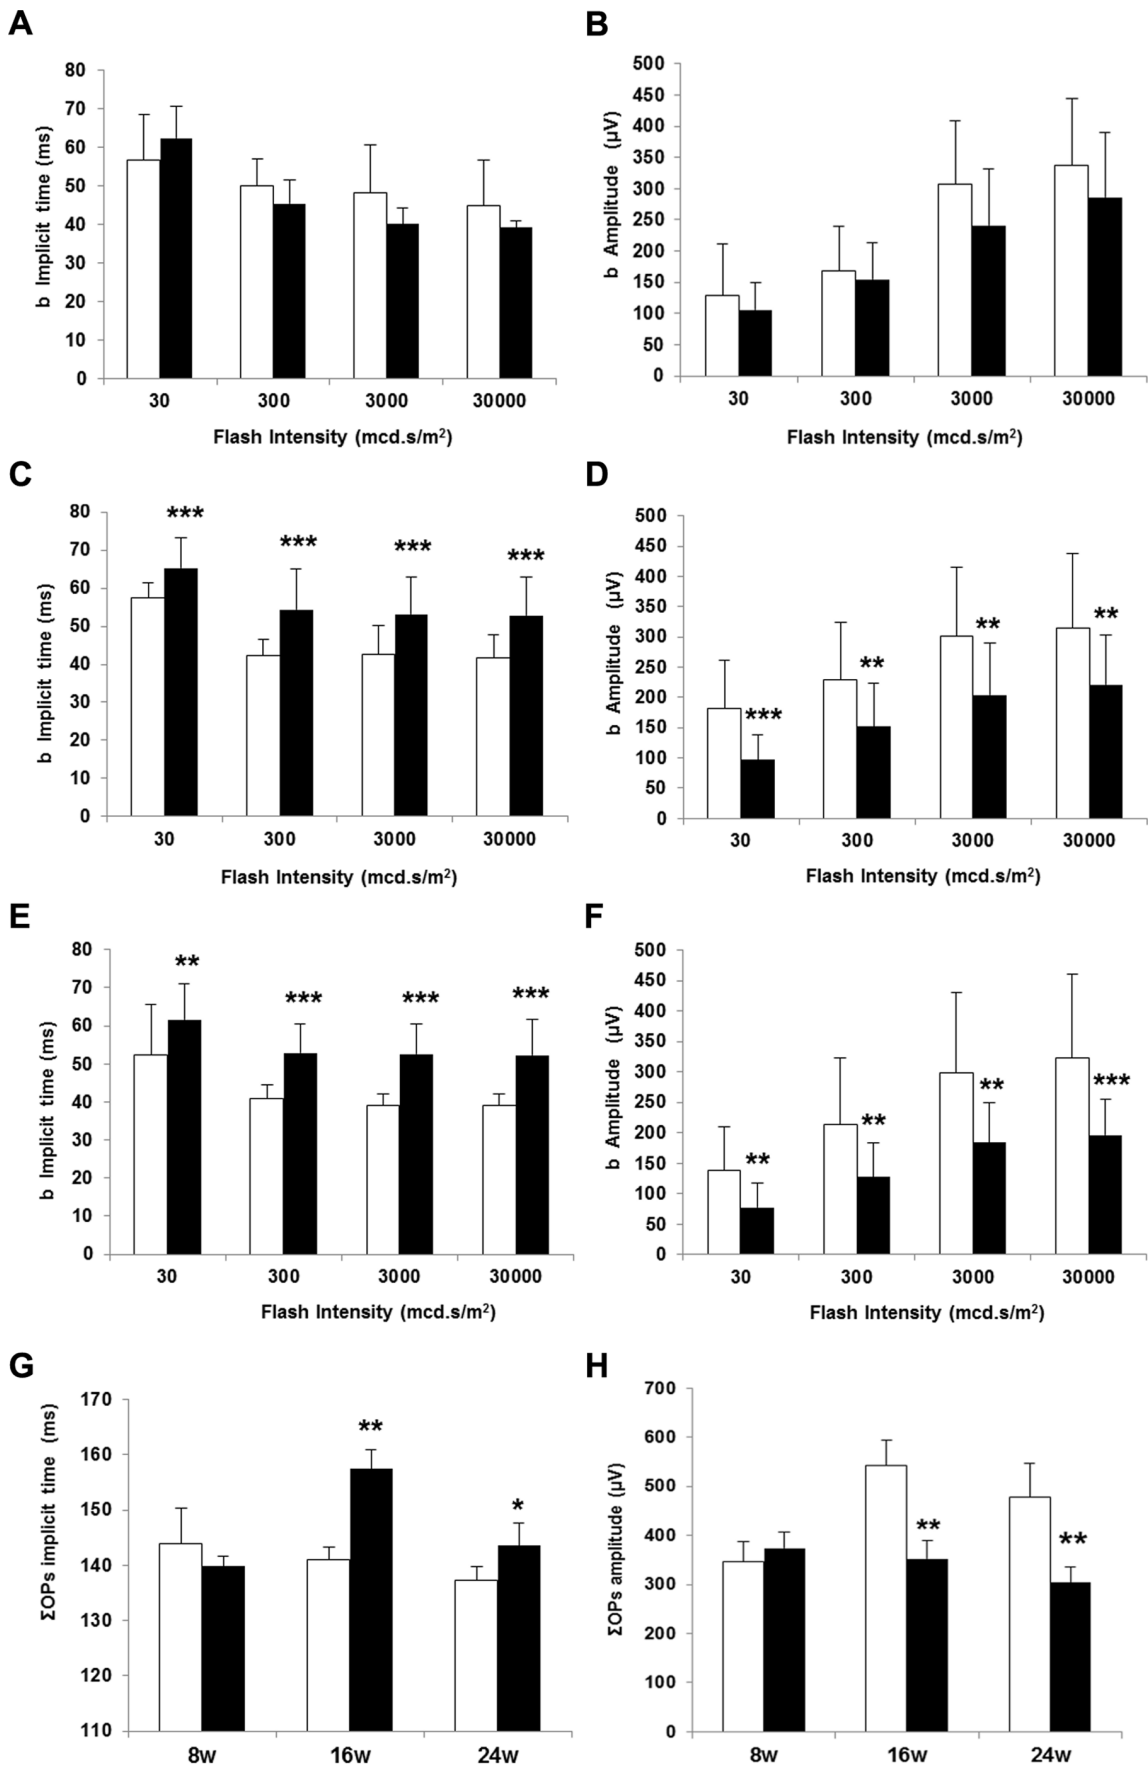

**Figure 2.** b-wave implicit time (ms) in non diabetic and diabetic mice at 8 (A), 16 (C) and 24 weeks (E).  $\Sigma$ OPs implicit time (ms) (G). b-wave amplitude ( $\mu$ V) in non diabetic and diabetic mice at 8 (B), 16 (D) and 24 weeks (F).  $\Sigma$ OPs amplitude ( $\mu$ V) (H). White bars: non diabetic mice. Black bars: diabetic mice. Data are expressed as mean  $\pm$  SD. \* $p$ <0.05; \*\* $p$ <0.01;\*\*\* $p$ <0.001. doi:10.1371/journal.pone.0097302.g002

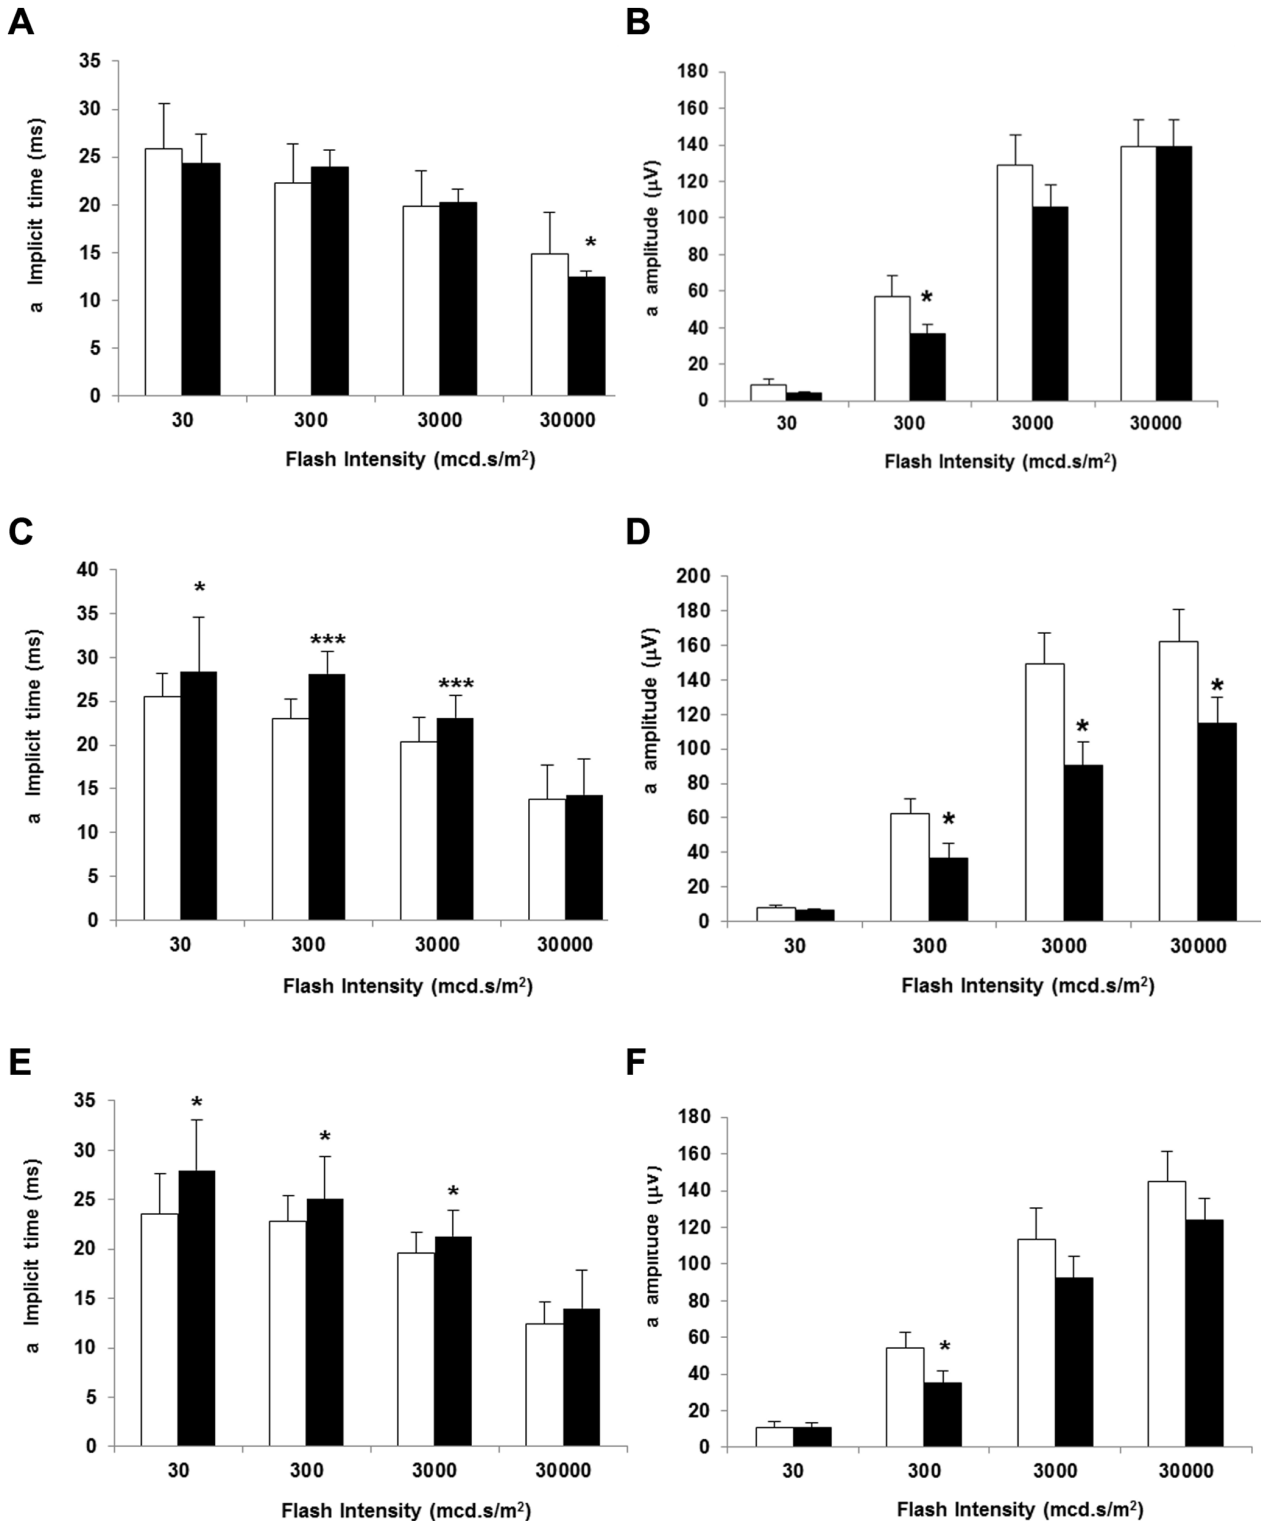

**Figure 3.** a-wave implicit time (ms) in non diabetic and diabetic mice at 8 (A), 16 (C) and 24 weeks (E). a-wave amplitude ( $\mu$ V) in non diabetic and diabetic mice at 8 (B), 16 (D) and 24 weeks (F). White bars: non diabetic mice. Black bars: diabetic mice. Data are expressed as mean  $\pm$  SD. \* $p$ <0.05. doi:10.1371/journal.pone.0097302.g003

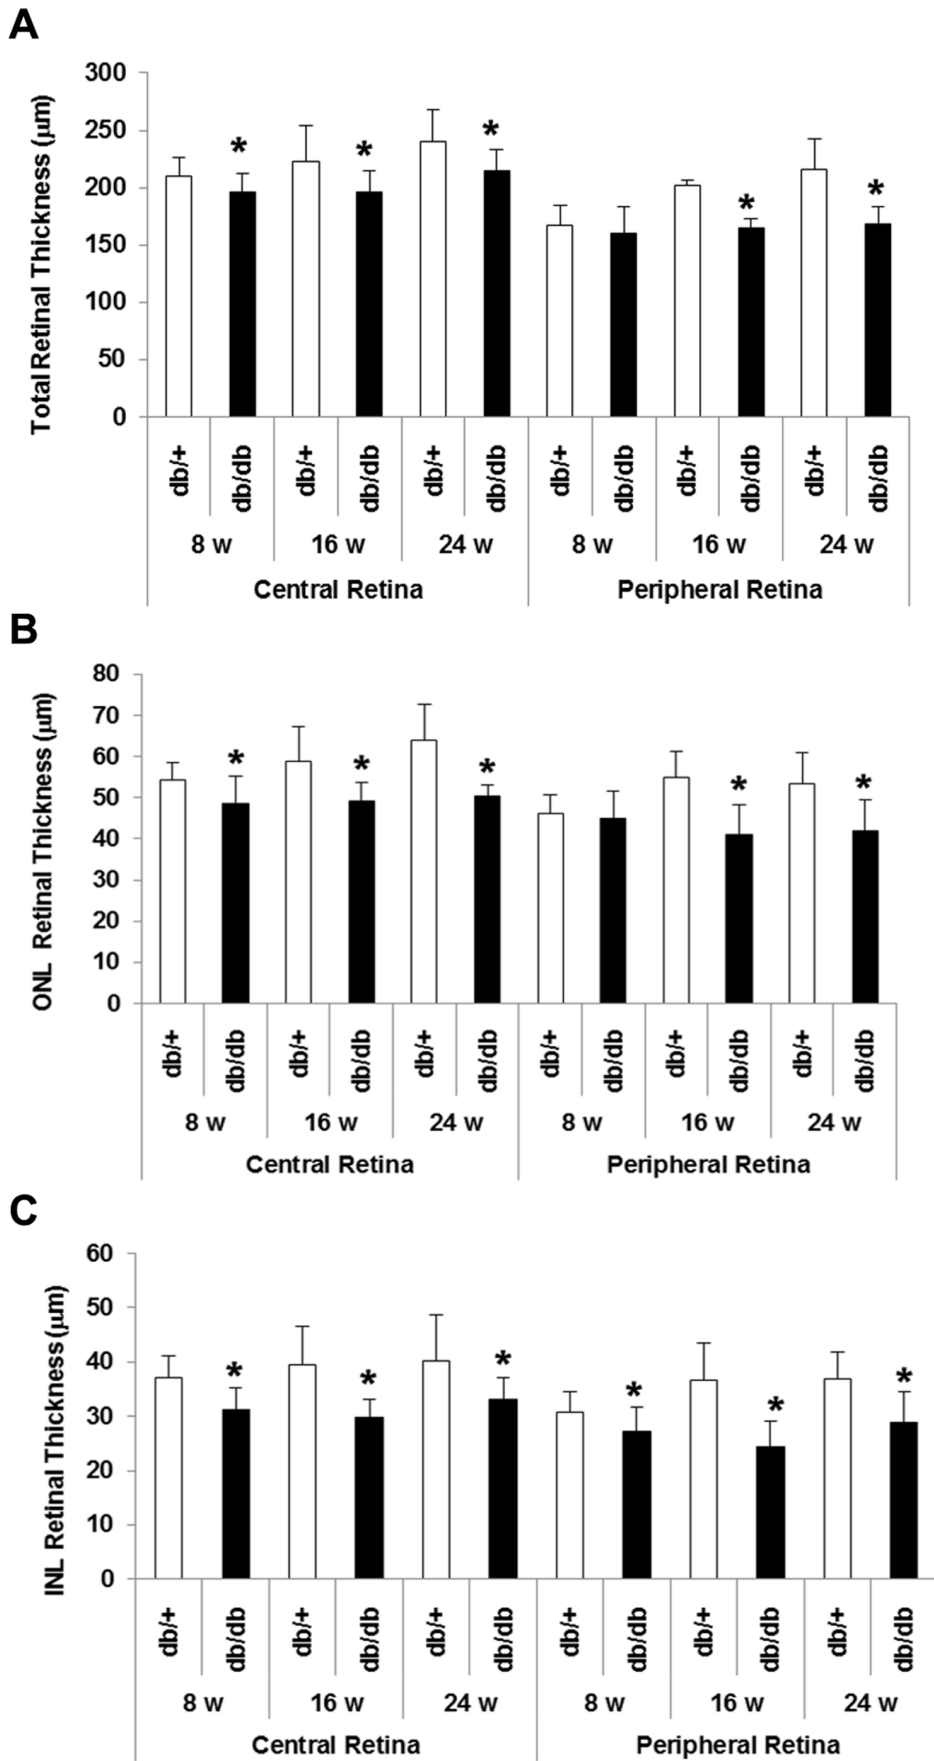

**Figure 4. Thickness of total retina (A), outer nuclear layer (B) and inner nuclear layer (C).** The measurements have been performed in the central retina and in peripheral retina. Results are expressed as mean  $\pm$  SD. \* $p$ <0.05 between non diabetic (white bars) and diabetic (black bars) mice.

doi:10.1371/journal.pone.0097302.g004

stored at  $-80^{\circ}\text{C}$  for protein assessments. The other eye was flash frozen in Tissue Freezing Medium (TFM, Electron Microscopy Sciences), by immersion in liquid nitrogen, and cryosectioned at  $8\ \mu\text{m}$  through the dorsal/ventral plane. Sections were mounted on slides and stored at  $-80^{\circ}\text{C}$ . These sections were prepared for the assessment of retinal morphology, evaluation of GFAP and TUNEL immunoreactivity. For caspase-3 immunohistochemistry, the eyes were fixed overnight in 10% neutral buffered formalin and embedded in paraffin. Ocular globes embedded in paraffin were sectioned ( $3\ \mu\text{m}$ ) along the eye axis.

### Neurodegeneration Measurements

**Retinal morphometry.** Microscopic evaluation of retinas included scanning tissue sections to evaluate morphology followed by systematic morphometric analysis. The sections were stained with hematoxylin and eosin (H&E). Images of H&E sections were captured with a microscope (Olympus, Lake Success, NY) using the program Image J for quantification. The measurements were taken at two peripheral and three central regions of the retina and were examined to ensure similar locations of measurements for all eyes. Sections through the posterior eye segment were defined as central retina when the plane passed through the optic nerve or at less than  $300\ \mu\text{m}$  from the optic head rim. The remaining sections from both sites of the optic nerve were considered as peripheral

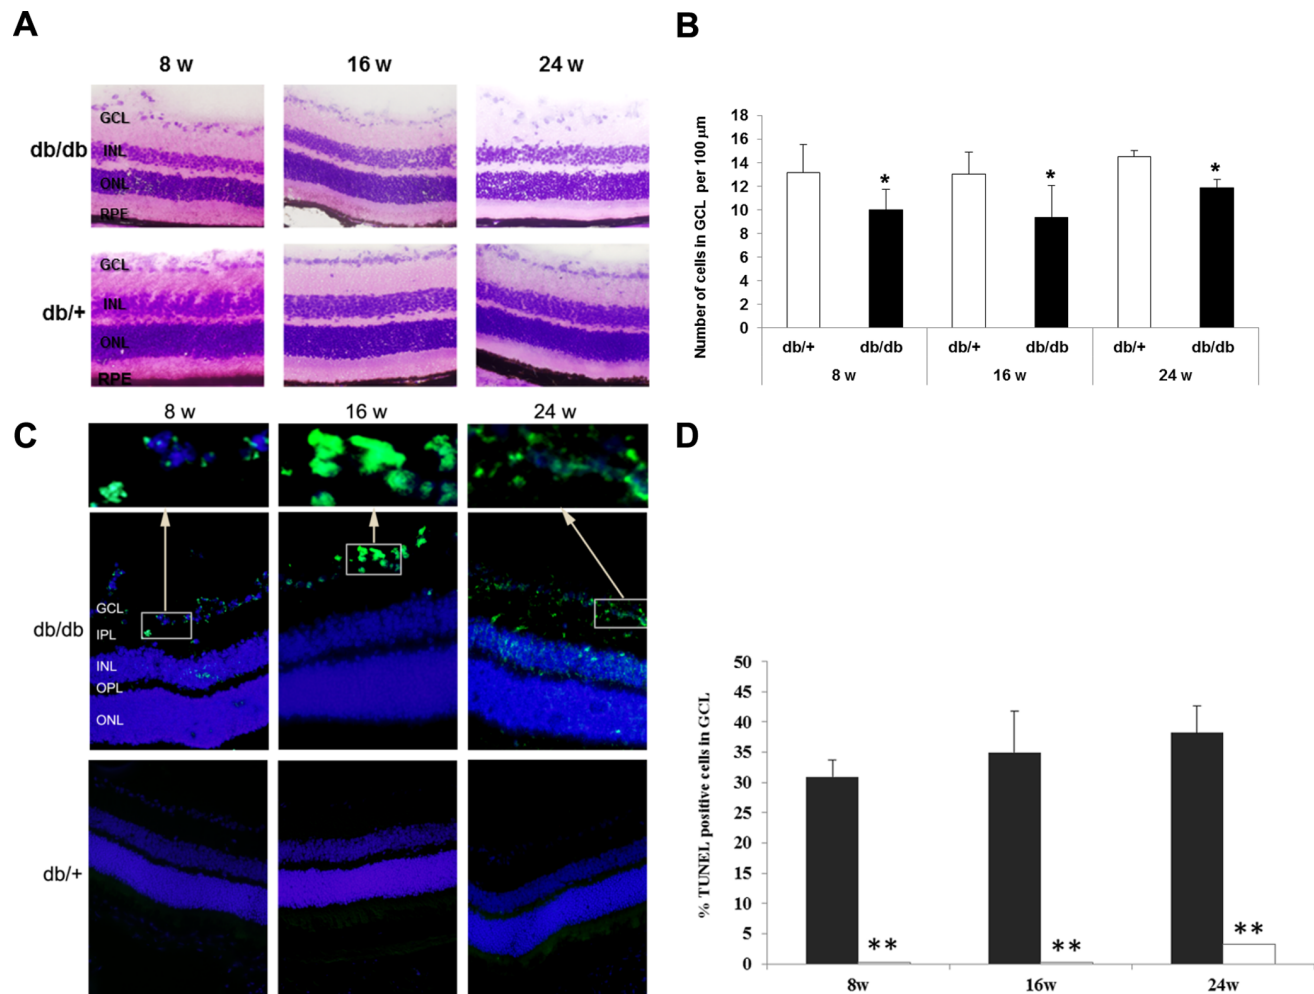

**Figure 5. Images demonstrating the progressive loss of cells in retinal ganglion layer (GCL).** A) Hematoxylin and eosin stained central retina in a representative case of a diabetic mouse (upper panel) and a non-diabetic mouse (lower panel) of 8, 16 and 24 weeks old. In the diabetic retina a loss of cells in GCL was observed. B) Cell number in GCL in control and diabetic mice in central retina. C) Comparison of TUNEL immunofluorescence (green) between representative samples from a diabetic (upper panel) and a non-diabetic mouse (lower panel) at 8 weeks, 16 and 24 weeks. Nuclei were labeled with Hoechst (blue). D) Percentage of TUNEL positive cells in the GCL in non-diabetic and diabetic mice at 8, 16 and 24 weeks (upper panel). ONL: outer nuclear layer; OPL: outer plexiform layer; INL: inner nuclear layer; IPL: inner plexiform layer; GCL: ganglion cell layer. Results are expressed as mean  $\pm$  SD. White bars: non-diabetic mice; Black bars: diabetic mice. \* $p$ <0.05, \*\* $p$ <0.001 between non-diabetic and diabetic mice.

doi:10.1371/journal.pone.0097302.g005

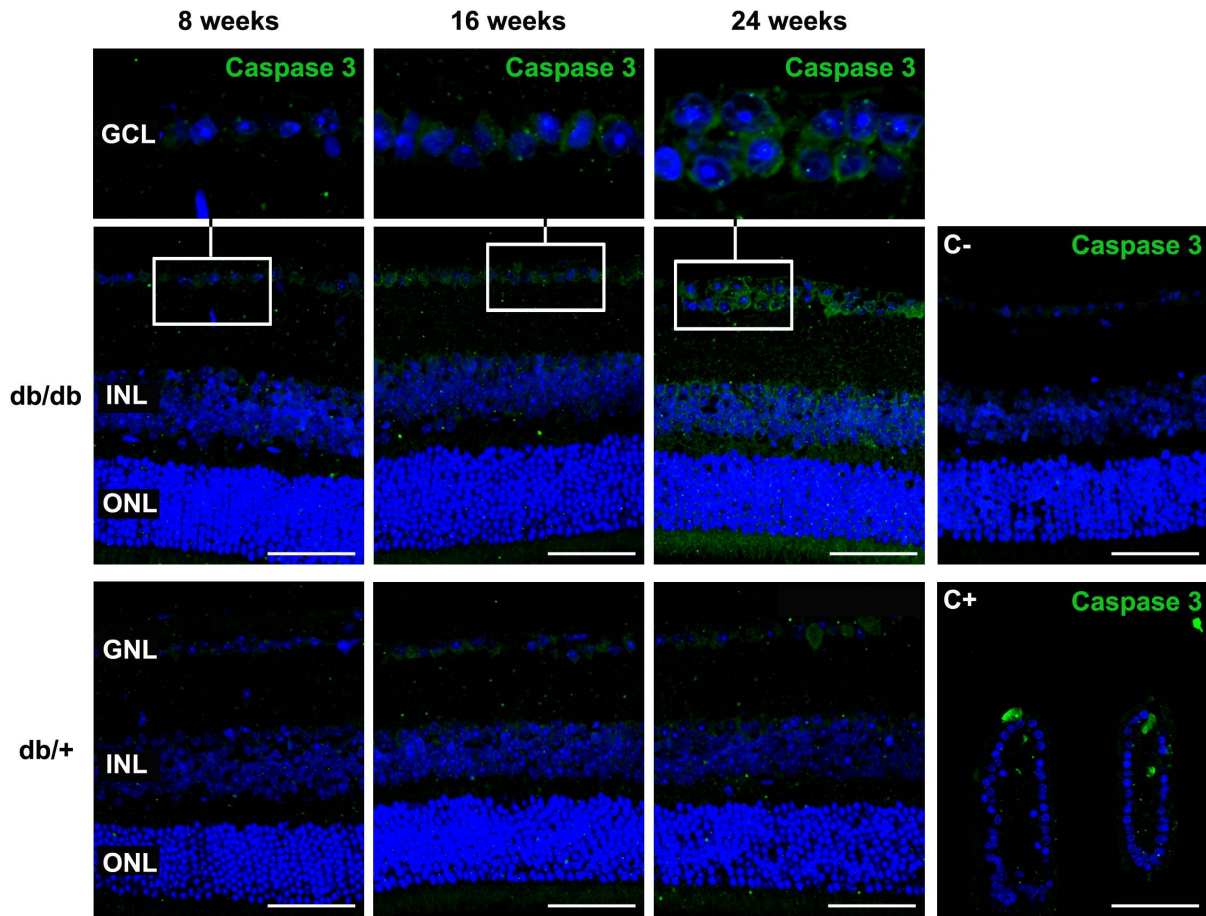

**Figure 6. Comparison of cleaved caspase-3 immunofluorescence (green) between representative samples from a diabetic (upper panel) and a non-diabetic mouse (lower panel) at 8, 16 and 24 weeks.** Insets show the increased expression of cleaved caspase-3 in cells residing in the ganglion cell layer (GCL) in db/db mice. Nuclei counterstained with Hoescht (blue). ONL: outer nuclear layer; INL: inner nuclear layer; C-: negative control; C+: positive control mouse jejunal villi. Scale bars: 40  $\mu$ m. doi:10.1371/journal.pone.0097302.g006

retina. Image analysis of ten sections of each region were used to quantify total retinal thickness, the thickness of the inner nuclear layer (INL), outer nuclear layer (ONL) and cell number per mm<sup>2</sup>

in ganglion cell layer (GCL). These measurements were performed by two of the investigators (P.B and L.C).

**Immunohistochemical analysis for glial activation assessment.** Glial activation was evaluated by fluorescence

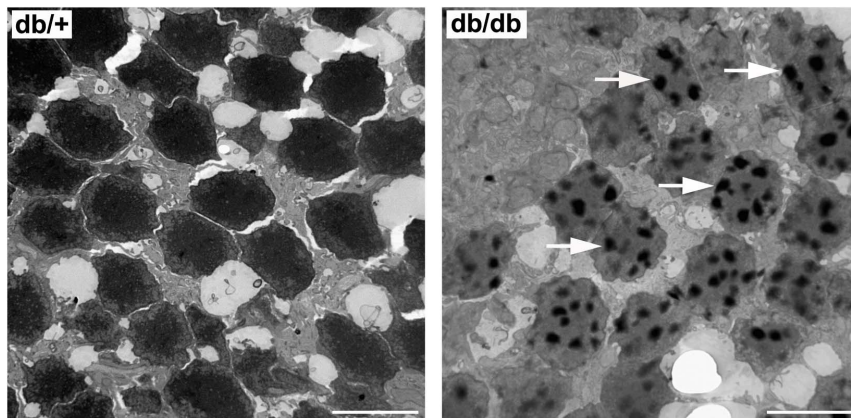

**Figure 7. Transmission electron micrographs of photoreceptors in a representative case of a non-diabetic (left panel) and a diabetic mouse (right panel) 8 weeks old.** Arrows indicate nuclear fragmentation. Scale bars: 6.71  $\mu$ m. doi:10.1371/journal.pone.0097302.g007

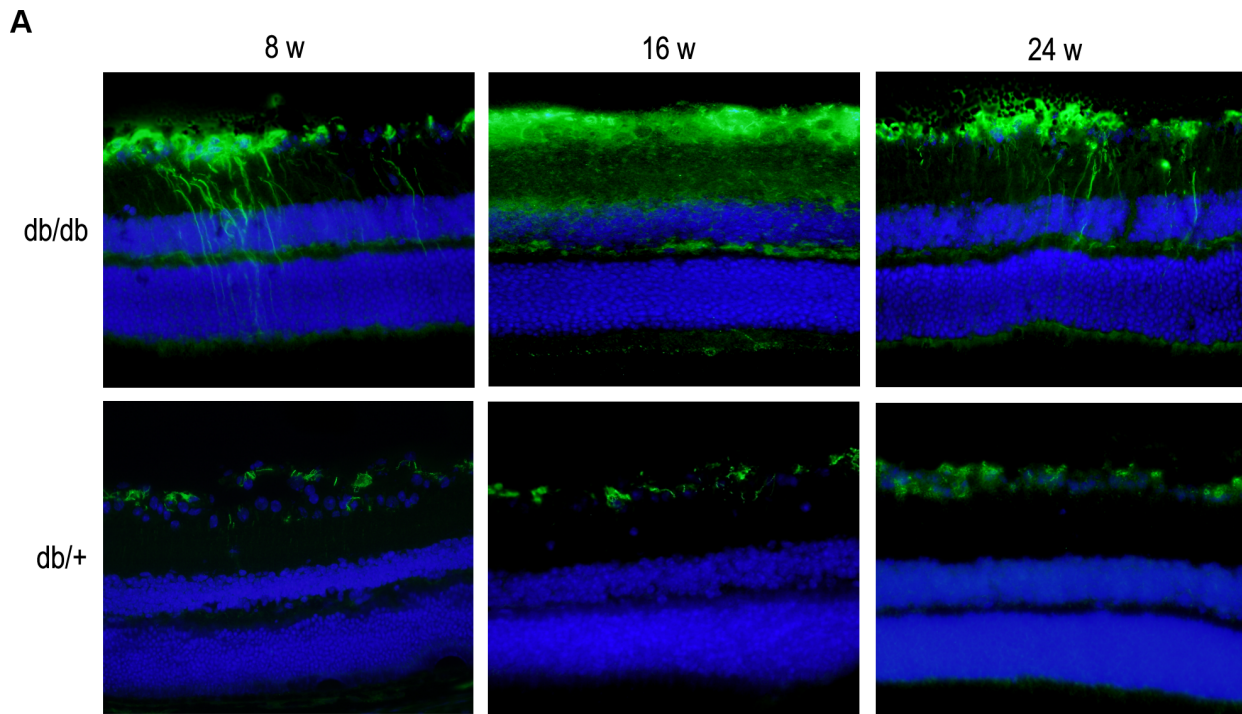

**B**

| score | % POSITIVE GFAP LABELING |      |       |      |       |      |
|-------|--------------------------|------|-------|------|-------|------|
|       | 8 w                      |      | 16 w  |      | 24 w  |      |
|       | db/db                    | db/+ | db/db | db/+ | db/db | db/+ |
| 1     | 0                        | 67   | 0     | 83   | 0     | 100  |
| 2     | 16                       | 33   | 0     | 17   | 0     | 0    |
| 3     | 50                       | 0    | 0     | 0    | 0     | 0    |
| 4     | 17                       | 0    | 0     | 0    | 0     | 0    |
| 5     | 17                       | 0    | 100   | 0    | 100   | 0    |

**Figure 8. Glial activation.** A) Comparison of GFAP immunofluorescence (green) between representative samples from a diabetic (upper panel) and a non-diabetic mouse (lower panel) at 8 weeks, 16 and 24 weeks. In the diabetic retina, the Müller cells' endfeet show abundant GFAP immunofluorescence and the radial processes stain intensely throughout both the inner and outer retina. Nuclei were labeled with DAPI (blue). ONL: outer nuclear layer; INL: inner nuclear layer; GCL: ganglion cell layer. B) Quantification of glial activation based on extent of GFAP staining. doi:10.1371/journal.pone.0097302.g008

microscopy using specific antibodies against GFAP (Glial fibrillar acidic protein). Sections were fixed in acid methanol ( $-20^{\circ}\text{C}$ ) for 2 min, followed by three washes with PBS, 5 min each. Sections were permeabilized with TBS-Triton X-100 0.025% and were incubated in blocker (1% BSA, and 10% goat serum in PBS) for 2 hours at room temperature. Sections were then incubated with rabbit anti- GFAP (Abcam Ltd, Cambridge, U.K.) (1:500 dilution prepared in blocking solution) overnight at  $4^{\circ}\text{C}$  in a humid atmosphere. After three washes in PBS, 5 min each, the sections were incubated with secondary antibody Alexa 488 goat-anti-rabbit (Life Technologies S.A, Madrid, Spain) (1:200 dilution prepared in blocking solution). The sections were washed three times in PBS, counterstained with Hoesch and mounted with

Mounting Medium Fluorescence (Prolong, Invitrogen) and mounted with a coverslip. Comparative digital images from diabetic and control samples were recorded with an Olympus microscope using identical brightness and contrast settings.

To evaluate the degree of glial activation we used a scoring system based on extent of GFAP staining previously used [25]. The scoring system was as follows: Müller cell endfeet region/GCL only (score 1); Müller cell endfeet region/GCL plus a few proximal processes (score 2); Müller cell endfeet plus many processes, but not extending to ONL (score 3); Müller cell endfeet plus processes throughout with some in the ONL (score 4); Müller cell endfeet plus lots of dark processes from GCL to outer margin of ONL (score 5).



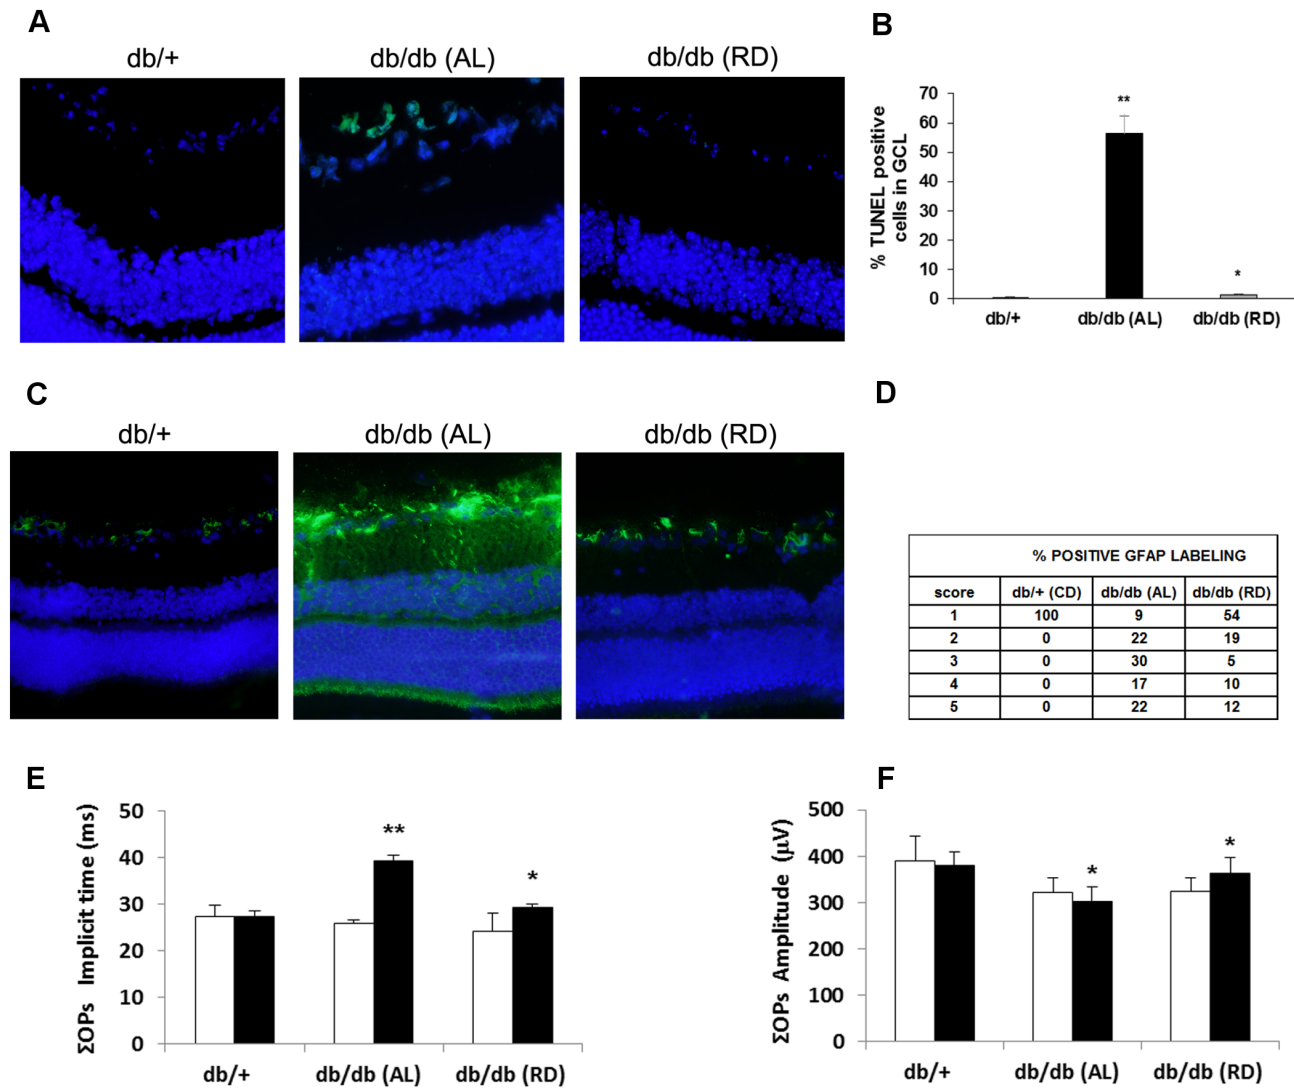

**Figure 9. Beneficial effects of lowering blood glucose by using restrictive diet on retinal neurodegeneration in db/db mice.** A) Comparison of TUNEL immunofluorescence (green) between representative samples from a diabetic mouse (db/db) *ad libitum* (AL) feeding (upper panel), a db/db mouse under dietary restriction (RD) (middle panel) and a control (db/+) mouse (lower panel) at 10 weeks. B) Percentage of TUNEL positive cells in the GCL in db/db mice *ad libitum* feeding (black bars), db/db mice under dietary restriction (gray bars) and control (db/+) mice (white bars) at 10 weeks.  $n = 10$  each group.  $*p < 0.05$  in comparison with db/db feeding AL.  $**p < 0.01$  in comparison with db/+ . C) Comparison of GFAP immunoreactivity (green) in the central retina between representative samples from a diabetic mouse (db/db) AL feeding (upper panel), a db/db mouse under dietary restriction (middle panel) and a control (db/+) mouse (lower panel) at 10 weeks. Nuclei were labeled with Hoechst (blue). ONL: outer nuclear layer; INL: inner nuclear layer; GCL: ganglion cell layer. D) Quantification of glial activation based on scoring system (see text) ( $n = 10$  each group). E)  $\Sigma$ OPs implicit time (ms) and F)  $\Sigma$ OPs amplitude ( $\mu$ V). White bars: before diet intervention. Black bars: after diet intervention. Data are expressed as mean  $\pm$  SD.  $*p < 0.05$ ;  $**p < 0.01$ . doi:10.1371/journal.pone.0097302.g009

**Immunohistochemical analysis for apoptosis assessment.** Apoptosis was evaluated using the TUNEL (Terminal Transferase dUTP Nick-End Labeling) method coupled with fluorescein (DeadEnd Fluorometric TUNEL System kit; PROMEGA, USA) with Hoechst 33342, Trihydrochloride, Trihydrate (Molecular Probes) staining. Cryosections of retina were permeabilised by incubation for 2 min on ice with 0.1% Triton X-100 in 0.1% sodium citrate, freshly prepared. Apoptotic cells were identified using green fluorescence [Alexa Fluor 594 goat-anti-rabbit (Invitrogen) (1:200 dilution prepared in blocking solution with 5% BSA)]. For evaluation by fluorescence microscopy an excitation wavelength in the range of 450–500 nm (e.g.,

488 nm) and detection in the range of 515–565 nm (green) was used.

**Immunohistochemistry for caspase-3.** Paraffined sections were rehydrated and washed in 0.01-M phosphate buffered saline (PBS). Then, they were incubated over night at 4°C with a rabbit anti-cleaved caspase-3 antibody (Cell Signalling Technology, Inc., Danvers, USA) at 1:300 dilution. Then, ocular sections were washed in PBS and incubated with the specific secondary antibody biotinylated anti-rabbit IgG (1:100) (Vector Laboratories, Burlingame, USA). Once washed in PBS, a streptavidin Alexa Fluor 488 conjugate (Molecular Probes-Life Technologies, Grand Island, USA) at 1:100 dilution was used to detect cleaved caspase-3 immunolabelling; the incubation was made over night at 4°C.

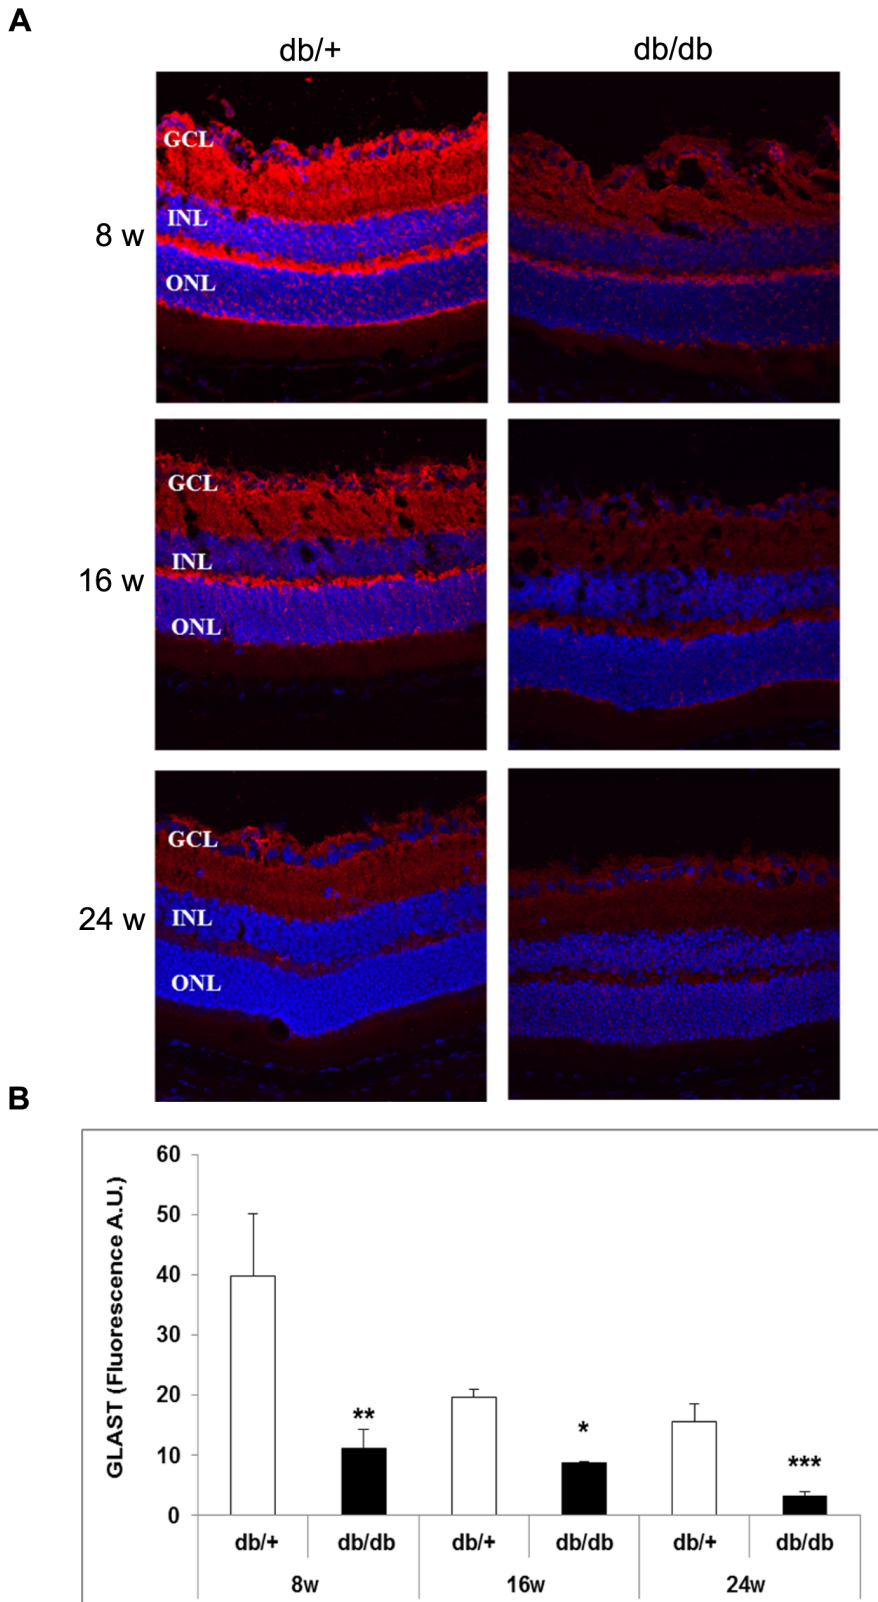

**Figure 10. Comparison of GLAST immunofluorescence between representative samples from non-diabetic and diabetic mice.** A) GLAST immunofluorescence (red) of representative samples from non-diabetic and diabetic mice at 8 weeks, 16 and 24 weeks. Nuclei were labeled with Hoechts (blue). ONL: outer nuclear layer; INL: inner nuclear layer; GCL: ganglion cell layer. B) Quantification of GLAST immunofluorescence in non-diabetic (white bars) and diabetic mice (black bars). A.U.: arbitrary units. \* $p < 0.05$ ; \*\* $p < 0.001$  between non-diabetic and diabetic mice. doi:10.1371/journal.pone.0097302.g010

**Table 1.** Genes up-regulated in retinas of diabetic mice.

| ID     | Symbol    | Gene name                                                             | LogFC | P Value |
|--------|-----------|-----------------------------------------------------------------------|-------|---------|
| 71760  | Agxt2l1   | Alanine-glyoxylate aminotransferase 2-like 1                          | 0.862 | 2.9E-07 |
| 19878  | Rock2     | Rho-associated, coiled-coil containing protein kinase 2               | 0.819 | 1.2E-06 |
| 66594  | Uqcr11    | Ubiquinol-cytochrome c reductase, complex III subunit XI              | 0.815 | 4.9E-06 |
| 11811  | Apobec2   | Apolipoprotein B mRNA editing enzyme, catalytic polypeptide-like 2    | 0.791 | 8.0E-08 |
| 20341  | Selenbp1  | Selenium binding protein 1                                            | 0.769 | 1.8E-04 |
| 57441  | Gmnn      | Geminin, DNA replication inhibitor                                    | 0.706 | 2.5E-05 |
| 15122  | Hba-a1    | Haemoglobin alpha, adult chain 1/2                                    | 0.691 | 1.4E-03 |
| 16668  | Krt18     | Keratin 18                                                            | 0.691 | 9.3E-09 |
| 11815  | Apod      | Apolipoprotein D                                                      | 0.677 | 5.4E-03 |
| 110880 | Scn4a     | Sodium channel, voltage-gated, type IV, alpha subunit                 | 0.599 | 7.8E-08 |
| 19872  | Rny1      | RNA, Ro-associated Y1                                                 | 0.591 | 2.9E-04 |
| 20557  | Slfn3     | Schlafen Family Member 12                                             | 0.577 | 2.4E-05 |
| 14719  | Got2      | Glutamic-oxaloacetic transaminase 2                                   | 0.530 | 2.1E-03 |
| 12865  | Cox7a1    | Cytochrome c oxidase subunit VIIa polypeptide 1                       | 0.511 | 6.7E-04 |
| 56338  | Txnip     | Thioredoxin interacting protein                                       | 0.509 | 6.5E-05 |
| 83554  | Fstl3     | Follistatin-like 3                                                    | 0.498 | 1.3E-05 |
| 12925  | Crip1     | Cysteine-rich protein 1                                               | 0.496 | 1.0E-06 |
| 319178 | Hist1h2bb | Histone cluster 1, h2bb                                               | 0.486 | 3.3E-05 |
| 11303  | Abca1     | ATP-binding cassette, sub-family A (ABC1), member 1                   | 0.485 | 1.7E-06 |
| 17873  | Gadd45b   | Growth arrest and DNA-damage-inducible, beta                          | 0.467 | 8.2E-03 |
| 19725  | Rfx2      | Regulatory factor x,2                                                 | 0.449 | 9.6E-04 |
| 66929  | Asf1b     | ASF1 anti-silencing function 1 homolog B                              | 0.447 | 2.4E-05 |
| 70893  | Glb1l3    | Galactosidase, beta 1 like 3                                          | 0.441 | 9.1E-05 |
| 11830  | Aqp5      | Aquaporin 5                                                           | 0.439 | 7.1E-03 |
| 30794  | Pdlim4    | PDZ and LIM domain 4                                                  | 0.437 | 1.2E-05 |
| 19784  | Rprl2     | Ribonuclease P RNA-like 2                                             | 0.427 | 8.3E-04 |
| 75316  | Taf1d     | TATA box binding protein (Tbp)-associated factor, RNA polymerase I, D | 0.418 | 4.5E-05 |
| 11927  | Atox1     | ATX1 (antioxidant protein 1) homolog 1                                | 0.399 | 3.6E-05 |
| 109900 | Asl       | Argininosuccinatelyase                                                | 0.397 | 1.3E-06 |
| 108015 | Chrb4     | Cholinergic receptor, nicotinic, beta polypeptide 4                   | 0.393 | 1.5E-03 |
| 15561  | Htr3a     | 5-hydroxytryptamine (serotonin) receptor 3A                           | 0.388 | 6.0E-04 |
| 319155 | Hist1h4c  | Histone cluster 1, H4c                                                | 0.387 | 1.1E-03 |
| 12306  | Anxa2     | Annexin A2                                                            | 0.387 | 4.3E-04 |
| 11854  | Rhod      | Ras homolog gene family, member D                                     | 0.386 | 2.8E-04 |
| 18129  | Notch2    | Notch gene homolog 2 (Drosophila)                                     | 0.385 | 1.6E-05 |
| 77462  | Tmem116   | Transmembrane protein 116                                             | 0.380 | 9.3E-05 |
| 70807  | Arrdc2    | Arrestin domain containing 2                                          | 0.378 | 1.1E-03 |
| 11853  | Rhoc      | Ras homolog gene family, member C                                     | 0.372 | 2.9E-05 |
| 227292 | Ctdsp1    | CTD small phosphatase 1                                               | 0.372 | 1.6E-03 |
| 171209 | Accn3     | Amiloride-sensitive cation channel 3                                  | 0.371 | 2.8E-03 |
| 69875  | Ndufa11   | NADH dehydrogenase (ubiquinone) 1 alpha subcomplex 11                 | 0.370 | 3.6E-06 |
| 65972  | Ifi30     | Interferon, gamma-inducible protein 30                                | 0.368 | 5.5E-04 |
| 74760  | Rab3il1   | RAB3A interacting protein (rabin3)-like 1                             | 0.363 | 1.2E-04 |
| 263406 | Plekhg3   | Pleckstrin homology domain containing, family G member 3              | 0.362 | 6.9E-05 |
| 71660  | Rarres2   | Retinoic acid receptor responder (tazarotene induced) 2               | 0.355 | 6.1E-03 |
| 212974 | Ath1l     | ATH1, acid trehalase-like 1                                           | 0.354 | 1.2E-03 |
| 12036  | Bcat2     | Branched chain amino-acid transaminase 2                              | 0.354 | 1.2E-05 |
| 68337  | Crip2     | Cysteine-rich protein 2                                               | 0.350 | 5.4E-03 |
| 22228  | Ucp2      | Uncoupling protein 2                                                  | 0.349 | 3.8E-03 |
| 66230  | Mrps28    | Mitochondrial ribosomal protein S28                                   | 0.349 | 1.2E-03 |

doi:10.1371/journal.pone.0097302.t001

Nuclear counterstaining with Hoescht stain solution (Sigma-Aldrich Chemie, Buchs, Switzerland) was performed for microscopic analysis with the laser scanning confocal microscope (TCS SP2; Leica Microsystems, Wetzlar, Germany). Negative control was carried out by omitting the primary antibody. Specific labeling of cleaved caspase-3 antibody in mouse jejunal paraffin sections was used as positive control.

**Transmission electron microscopy analysis.** One mm<sup>3</sup> retinal fragments were dissected from four 8 week-old db/db mice. Retinas from four age-matched db/+ mice were used as control retinas. Retinal fragments were fixed in 2.5% glutaraldehyde and 2% paraformaldehyde, post fixed in 1% osmium tetroxide, stained in aqueous uranyl acetate, dehydrated and embedded in spurr resin. Ultrathin sections (70 nm) were stained with lead citrate and examined under transmission electron microscopy (Jeol 1400; Jeol Ltd., Tokyo, Japan).

### Glutamate Quantification

Quantification of glutamate was performed by liquid-chromatography coupled to mass spectrometry (LC-MS/MS). Chromatographic separation was performed on an Agilent 1200 series (Waldbronn, Germany) using an Ascentis Express HILIC column, 50×2.1 mm with 2.7 μm particle size from Supelco (Belfonte, PA) maintained at 25°C throughout the analysis, a mobile phase acetonitrile and water (50 mM ammonium acetate) with a flow rate of 0.6 mL min<sup>-1</sup>. The volume injected was 10 μL. The mobile phase involved a gradient starting at 87% of ACN which was maintained for 3 minutes. Then, from min 3 to 10 the ACN content was decreased to 20% and increased again to 87% at min 12.5. Glutamate was eluted at 6.5 minutes. The mass detection system was an Agilent 6410 Triple Quad (Santa Clara, CA) using positive electrospray ionization with a gas temperature of 350°C, gas flow rate of 12 L min<sup>-1</sup>, nebulizer pressure of 45 psi, capillary voltage of 3500 V, fragmentor of 135 V and collision energy of 10 V.

### Immunohistochemistry for GLAST

Glutamate/aspartate transporter (GLAST) and L-glutamate was evaluated by fluorescence microscopy using specific antibodies. Sections were incubated in blocking solution (3% BSA, Tween 0.05% PBS) for 1 h. at room temperature followed by incubation with primary antibody rabbit anti-GLAST (EAAT1) (1:100, Abcam ab416, Cambridge, UK). After washing, sections were incubated with a fluorescent anti-rabbit ALEXA 594 as a secondary antibody (Life Technologies S.A, Madrid, Spain) in blocking solution for 1 h, washed, nuclei were stained with Hoechst and mounted in Mounting Medium Fluorescence (Prolong, Invitrogen) with a coverslip. Fluorescence intensity of images was quantified by ImageJ.

### DNA Microarrays

Gene expression profiling analysis in retinas of 8-week old diabetic (db/db) mice and non-diabetic (db/+) controls was performed using Mouse Gene 1.0 ST DNA arrays (Affymetrix, UK). For this purpose, total RNA was first isolated from retinas (n = 4/group) using the RNeasy Mini Kit (Qiagen, Germany) and 200 ng were then used to synthesize sense ssDNA with the Ambion WT Expression Kit (Life Technologies, UK). Next, ssDNA was fragmented, labeled and hybridized onto DNA microarrays using the GeneChip WT Terminal Labeling and Hybridization Kit and the GeneTitan platform (Affymetrix, UK), following the manufacturer's instructions. Microarray Analysis Suite 5.0 software was used to process the microarray images and analysis of the data obtained was performed by the Statistics and

Bioinformatics Unit of the Vall d'Hebron-Research Institute using the open source software Bioconductor.

### Gene Expression

Real-time quantitative PCR was used to quantify relative transcript levels in retinas of 8-week old diabetic and control mice. 400 ng of total RNA were used to synthesize cDNA by using SuperScript II reverse transcriptase (Life Technologies, USA) and oligo(dT) primers. Quantitative PCR was performed by using gene-specific primers and SYBR Green in an ABI PRISM 7500 Sequence Detection System (Applied Biosystems, UK). Relative mRNA expression was calculated according to the 2<sup>-ΔΔCT</sup> threshold method, using cyclophilin A as a reference gene [26].

### Statistical Analysis

Normal distribution of the variables was evaluated using the Kolmogorov-Smirnov test. Comparisons of continuous variables were performed using the paired and unpaired Student t-test. Levels of statistical significance were set at p<0.05.

## Results

### Blood Glucose Levels

The diagnosis of diabetes was based on blood glucose levels. The mice with blood glucose level greater than 250 mg/dl were confirmed as diabetic mice. In the control group (db/+) blood glucose levels were <150 mg/dl during the follow-up whilst all db/db mice presented blood glucose >250 mg/dl at 4 weeks of age. Animal body weight and glucose levels are shown in Figure 1. We observed that hyperglycemia in diabetic mice runs in parallel with a significant increase of weight.

### ERG Abnormalities

The average b-wave implicit times and b-wave amplitudes as a function of flash intensity are presented in Figure 2 (A–F). The b-wave implicit time significantly increased in diabetic mice at all flash intensities tested when compared with non-diabetic mice at 16 and 24 weeks. However, the implicit time was not significantly delayed in diabetic mice at 8 weeks of age. In addition, b-wave amplitude was significantly reduced in diabetic mice in comparison with non diabetic mice at 16 and 24 weeks but not at 8 weeks. The changes observed in amplitude and implicit time of the a-wave in diabetic mice in comparison with non-diabetic mice were less marked than that observed in b-wave (Figure 3).

The OPs amplitudes measured under scotopic conditions and the corresponding implicit times are shown in Figure 2 (G, H). We detected statistically significant differences (increase of implicit time and decrease of amplitude) at 16 and 24 weeks.

### Retinal Morphometry

Measurements of retinal thickness in diabetic and in non diabetic mice at 8, 16 and 24 weeks are shown in Figure 2. Since postnatal growth of retinal thickness exists in C57BL mice until month 6 [27,28], a progressive increase in the thickness of retinas from non-diabetic mice was observed whereas this was not the case in diabetic mice. Total retinal thickness (measured from inner limiting membrane to Bruch's membrane) in both central and peripheral retina was significantly decreased in diabetic mice in comparison with non-diabetic mice at 16 and 24 weeks (Figure 4). Furthermore, a thickening in both ONL and INL (Figure 4) as well as a reduction in the number of cells in the GCL (Figure 5B) was observed in diabetic mice in comparison with non-diabetic mice at 8, 16 and 24 weeks.

**Table 2.** Genes down-regulated in retinas of diabetic mice.

| ID     | Symbol    | Gene name                                                           | LogFc  | P value |
|--------|-----------|---------------------------------------------------------------------|--------|---------|
| 12182  | Bst1      | Bone marrow stromal cell antigen                                    | -0.495 | 9.0E-06 |
| 219257 | Pcdh20    | Protocadherin                                                       | -0.440 | 4.0E-04 |
| 319554 | Idi1      | Isopentenyl-diphosphate delta isomerase 1                           | -0.438 | 6.8E-05 |
| 12293  | Cacna2d1  | Calcium channel, voltage-dependent, alpha 2/delta subunit 1         | -0.437 | 4.0E-04 |
| 331487 | Uprt      | Uracil phosphoribosyltransferase (FUR1) homolog                     | -0.435 | 8.6E-04 |
| 83924  | Gpr137b   | G protein-coupled receptor 137B                                     | -0.407 | 1.9E-03 |
| 66917  | Chordc1   | Cysteine and histidine-rich domain (CHORD) containing               | -0.399 | 3.3E-04 |
| 66637  | Tsen15    | tRNA splicing endonuclease 15 homolog                               | -0.398 | 7.9E-03 |
| 20383  | Srsf3     | Terine/arginine-rich splicing factor 3                              | -0.390 | 5.4E-03 |
| 26557  | Homer2    | Homer homolog 2                                                     | -0.390 | 1.3E-03 |
| 67681  | Mrpl18    | Mitochondrial ribosomal protein L18                                 | -0.383 | 9.5E-03 |
| 217951 | Tmem196   | Transmembrane protein                                               | -0.383 | 9.9E-04 |
| 105727 | Slc38a1   | Solute carrier family 38, member 1                                  | -0.362 | 4.7E-04 |
| 74182  | Gpcpd1    | Glycerophosphocholine phosphodiesterase GDE1 homolog                | -0.356 | 5.7E-06 |
| 229279 | Hnrnpa3   | Heterogeneous nuclear ribonucleoprotein A3                          | -0.352 | 9.5E-05 |
| 21333  | Tac1      | Tachykinin, precursor 1                                             | -0.352 | 5.2E-03 |
| 14405  | Gabrg1    | Gamma-aminobutyric acid (GABA) A receptor, gamma 1                  | -0.352 | 4.2E-03 |
| 102910 | Armcx4    | Armaddillo repeat containing, X-linked 4                            | -0.351 | 9.7E-05 |
| 59058  | Bhlhe22   | Basic helix-loop-helix family, member e22                           | -0.351 | 1.9E-03 |
| 14401  | Gabrb2    | Gamma-aminobutyric acid (GABA) A receptor, beta 2                   | -0.349 | 5.6E-05 |
| 57329  | Otor      | Otoraplin                                                           | -0.345 | 1.8E-03 |
| 70930  | Nol8      | Nucleolar protein 8                                                 | -0.343 | 3.1E-04 |
| 70620  | Ube2v2    | Ubiquitin-conjugating enzyme E2 variant 2                           | -0.342 | 9.7E-04 |
| 331487 | Uprt      | Uracil phosphoribosyltransferase (FUR1) homolog                     | -0.342 | 1.2E-03 |
| 56353  | Rybp      | RING1 and YY1 binding protein                                       | -0.341 | 9.6E-03 |
| 71599  | Senp8     | SUMO/sentrin specific peptidase family member 8                     | -0.339 | 8.9E-03 |
| 15289  | Hmgb1     | High mobility group box 1                                           | -0.334 | 6.3E-03 |
| 15505  | Hsph1     | Heat shock 105 kDa/110 kDa protein                                  | -0.333 | 1.1E-03 |
| 93739  | Gabarapl2 | Gamma-aminobutyric acid (GABA) A receptor-associated protein-like 2 | -0.331 | 7.1E-03 |
| 668923 | Zfp442    | Zinc finger protein 442                                             | -0.328 | 6.0E-03 |
| 72289  | Malat1    | Metastasis associated lung adenocarcinoma transcript 1              | -0.325 | 1.1E-04 |
| 14009  | Etv1      | Ets variant 1                                                       | -0.325 | 6.7E-03 |
| 11798  | Xiap      | Apoptotic suppressor protein                                        | -0.323 | 2.5E-04 |
| 17968  | Ncam2     | Neural cell adhesion molecule 2                                     | -0.320 | 6.1E-04 |
| 76184  | Abca6     | ATP-binding cassette, sub-family A (ABC1), member 6                 | -0.314 | 1.4E-03 |
| 12300  | Cacng2    | Calcium channel, voltage-dependent, gamma subunit 2                 | -0.314 | 4.8E-03 |
| 109905 | Rap1a     | RAP1A, member of RAS oncogene family                                | -0.314 | 8.5E-04 |
| 71206  | Katnal2   | Katanin p60 subunit A-like 2                                        | -0.312 | 4.3E-03 |
| 20541  | Slc8a1    | Solute carrier family 8, member 1                                   | -0.312 | 3.1E-03 |
| 14417  | Gad2      | Glutamate decarboxylase 2                                           | -0.311 | 6.6E-03 |
| 14823  | Grm8      | Glutamate receptor, metabotropic 8                                  | -0.310 | 2.0E-03 |
| 14799  | Gria1     | Glutamate receptor, ionotropic, AMPA 1                              | -0.310 | 2.8E-04 |
| 19128  | Pros1     | Protein S                                                           | -0.309 | 1.1E-03 |
| 320772 | Mdga2     | MAM domain containing glycosylphosphatidylinositol anchor 2         | -0.307 | 2.9E-04 |
| 243382 | Ppm1k     | Protein phosphatase 1K                                              | -0.306 | 1.5E-03 |
| 246229 | Bivm      | Basic, immunoglobulin-like variable motif containing                | -0.305 | 8.1E-05 |
| 228942 | Cbln4     | Cerebellin 4                                                        | -0.304 | 1.4E-03 |
| 11658  | Alcam     | Activated leukocyte cell adhesion molecule                          | -0.303 | 1.8E-03 |
| 18718  | Pip4k2a   | Phosphatidylinositol-5-phosphate 4-kinase, type II, alpha           | -0.302 | 2.9E-04 |
| 18231  | Nxph1     | Neurexophilin 1                                                     | -0.302 | 8.0E-04 |

doi:10.1371/journal.pone.0097302.t002

## Neurodegeneration Features

A significant increase in TUNEL-positive immunofluorescence was observed in diabetic mice in comparison with retinas from non-diabetic mice at 8, 16 weeks and 24 weeks (Figure 5C). Since the TUNEL-positive cells were mainly localized in the GCL, we also counted the percentage of apoptotic cells in this layer, and a significant increase was found in diabetic mice in comparison with non-diabetic mice at 8, 16 and 24 weeks (Figure 5D). In addition, activated caspase-3 was found significantly higher in the retina of db/db mice in comparison with non-diabetic mice at 8, 16 and 24 weeks (Figure 6).

Since in the ERG measurements we found a-wave abnormalities, which mainly indicate photoreceptor impairment, we wanted

to examine whether apoptosis was also present in photoreceptors. For this purpose transmission electron microscopy was used and striking DNA fragmentation was found in photoreceptors from db/db mice in comparison with non-diabetic mice (Figure 7).

As expected, in non-diabetic mice GFAP expression was confined to the retinal GCL (GFAP score  $\leq 2$ ) (Figure 8). In contrast, in diabetic mice we observed the “reactive” diabetic phenotype characterized by upregulation of GFAP in Müller cells (GFAP score  $\geq 2$  at week 8 and score = 5 at 16 and 24 weeks).

All these features of neurodegeneration were more intense at 16 than at 8 weeks, but no significant differences between 16 and 24 weeks were observed.

**Table 3.** Gene enrichment analysis of genes differentially expressed in retinas of diabetic mice.

| Ontology                    | GO ID      | GO Term                                                                                     | P value (P<1E-03) |
|-----------------------------|------------|---------------------------------------------------------------------------------------------|-------------------|
| <b>Down-regulated genes</b> |            |                                                                                             |                   |
| MF                          | GO:0003723 | RNA binding                                                                                 | 6.18E-08          |
| MF                          | GO:0004971 | Alpha-amino-3-hydroxy-5-methyl-4 isoxazole propionate selective glutamate receptor activity | 1.38E-05          |
| MF                          | GO:0005488 | Binding                                                                                     | 2.8E-05           |
| MF                          | GO:0022891 | Substrate-specific transporter activity                                                     | 2.1E-04           |
| MF                          | GO:0005313 | L-glutamate transporter activity                                                            | 2.7E-04           |
| MF                          | GO:0046943 | Carboxylic acid transporter activity                                                        | 4.8E-04           |
| BP                          | GO:0007268 | Synaptic transmission                                                                       | 2.4E-06           |
| BP                          | GO:0007268 | Transmission of nerve impulse                                                               | 2.98E-06          |
| BP                          | GO:0035637 | Multicellular organismal signaling                                                          | 2.98E-06          |
| BP                          | GO:0015931 | Nucleobase-containing compound transport                                                    | 1.0E-04           |
| BP                          | GO:0044237 | Cellular metabolic process                                                                  | 1.0E-04           |
| BP                          | GO:0050657 | Nucleic acid transport                                                                      | 1.9E-04           |
| CC                          | GO:0043005 | Neuron projection                                                                           | 3.1E-07           |
| CC                          | GO:0045202 | Synapse                                                                                     | 5.5E-06           |
| CC                          | GO:0005622 | Intracellular                                                                               | 5.6E-06           |
| CC                          | GO:0044456 | Synapse part                                                                                | 5.9E-06           |
| CC                          | GO:0032279 | Asymmetric synapse                                                                          | 2.2E-05           |
| CC                          | GO:0044424 | Intracellular part                                                                          | 2.4E-05           |
| <b>Up-regulated genes</b>   |            |                                                                                             |                   |
| MF                          | GO:0003735 | Structural constituent of ribosome                                                          | 8.1E-05           |
| MF                          | GO:0015078 | Hydrogen ion transmembrane transporter activity                                             | 3.2E-04           |
| MF                          | GO:0004364 | Glutathione transferase activity                                                            | 6.6E-04           |
| MF                          | GO:0019843 | rRNA binding                                                                                | 7.7E-04           |
| BP                          | GO:0006979 | Response to oxidative stress                                                                | 6.3E-05           |
| BP                          | GO:0007589 | Body fluid secretion                                                                        | 1.4E-04           |
| BP                          | GO:0016049 | Cell growth                                                                                 | 4.6E-04           |
| BP                          | GO:0034599 | Cellular response to oxidative stress                                                       | 6.3E-04           |
| BP                          | GO:0090208 | Positive regulation of triglyceride metabolic process                                       | 7.2E-04           |
| BP                          | GO:0070301 | Cellular response to hydrogen peroxide                                                      | 8.5E-04           |
| CC                          | GO:0005840 | Ribosome                                                                                    | 1.4E-07           |
| CC                          | GO:0070469 | Respiratory chain                                                                           | 5.8E-06           |
| CC                          | GO:0022626 | Cytosolic ribosome                                                                          | 1.0E-05           |
| CC                          | GO:0044429 | Mitochondrial part                                                                          | 1.3E-05           |
| CC                          | GO:0044444 | Cytoplasmic part                                                                            | 1.3E-05           |
| CC                          | GO:0005743 | Mitochondrial inner membrane                                                                | 1.4E-05           |

Only the six most significant gene ontology (GO) terms in each category are shown (MF, molecular function; BP, biological process; CC, cellular compartment). doi:10.1371/journal.pone.0097302.t003

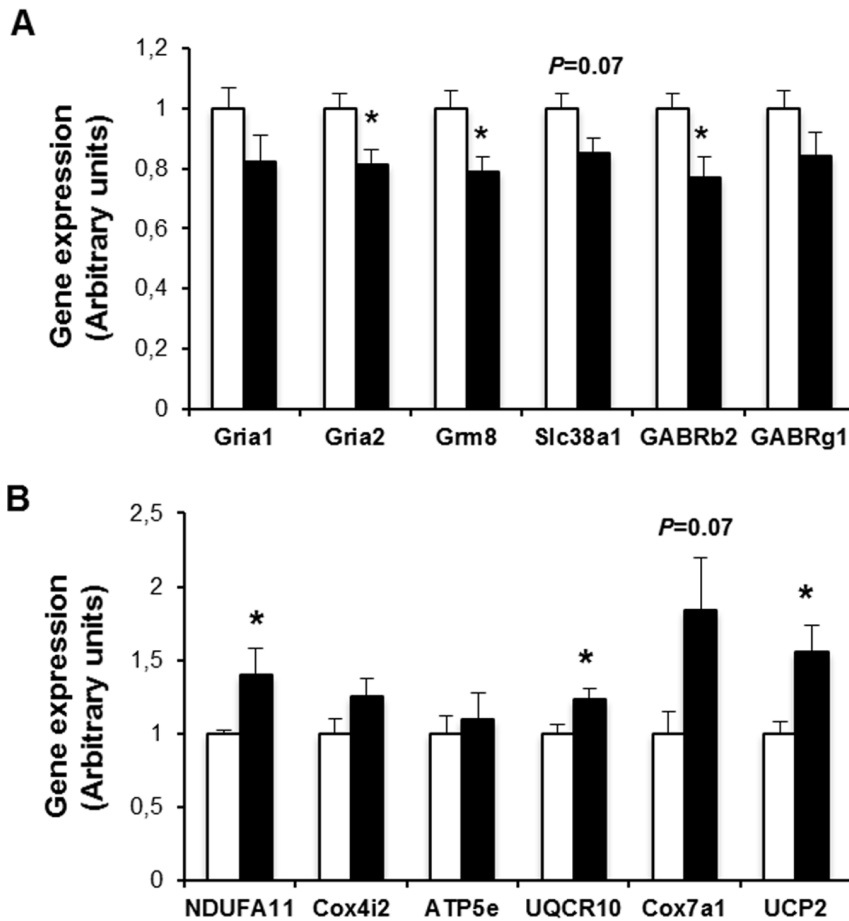

**Figure 11. Relative expression of genes involved neurotransmission (A) and mitochondrial function (B) in retinas of diabetic mice (black bars) and control non-diabetic mice (white bars) was assessed by real-time quantitative PCR. Results are expressed as mean  $\pm$  SEM,  $n=9-10$ /group. \* $p<0.05$ . doi:10.1371/journal.pone.0097302.g011**

### Effect of Lowering Blood Glucose on Retinal Neurodegeneration

As expected, db/db mice fed for 15 days with restrictive diet presented lower weight and blood glucose levels than those mice fed with *ad libitum* diet (weight:  $32.5 \pm 2.8$  gr vs.  $42.2 \pm 2.5$  gr;  $p<0.05$ ; blood glucose:  $318 \pm 27$  mg/dL vs.  $536 \pm 29$  mg/dL,  $p<0.01$ ). At this point (after 15 days of dietary restriction) a significantly lower GFAP immunofluorescence and a lower ratio of apoptosis in GCL were detected (Figures 9 A–D). Finally, ERG abnormalities were significantly arrested (Figure 9 E–F).

### Markers of Glutamate Pathway

Glutamate levels ( $\mu\text{M/g}$  total protein) were higher in diabetic mice in comparison with non diabetic mice at 8 weeks ( $60 \pm 8$  vs.  $38 \pm 6$ ;  $p<0.05$ ), 16 weeks ( $108 \pm 12$  vs.  $56 \pm 10$ ;  $p<0.05$ ) and 24 weeks ( $125 \pm 11$  vs.  $57 \pm 9$ ;  $p<0.05$ ). The progressive increase of glutamate levels in diabetic mice run in parallel with a decrease in GLAST content. GLAST was significantly decreased in diabetic mice in comparison with the non diabetic mice (Figure 10).

### Transcriptomic Analysis

To unravel the molecular mechanisms involved in early retinal neurodegeneration besides glutamate and its metabolic pathways, we performed a genome-wide expression profiling analysis on total RNA isolated from retinas of 8-week old diabetic (db/db) and

control littermate mice. After filtering for redundant and non-annotated genes, we found that 657 genes were differentially expressed in retina of diabetic mice ( $P<0.01$ ). Of these genes, we found 316 genes to be up-regulated and 341 down-regulated. The main genes up-regulated and down-regulated are listed in Table 1 and Table 2, respectively. To gain insight into the biological function of the genes differentially expressed in retinas of diabetic mice, a gene enrichment analysis was performed. Interestingly, we found that Gene Ontology (GO) terms significantly enriched among the down-regulated genes fitted into categories related to synaptic transmission, with a particular abundance of terms related to glutamate transport and metabolism (Table 3). On the other hand, the GO terms significantly over-presented among the up-regulated genes corresponded to categories related to mitochondrial respiration and oxidative stress (Table 3).

Real time quantitative PCR confirmed an approximately 20% reduction in the expression of genes related to neurotransmission, such as inotropic glutamate receptor-1 and -2 (Gria-1 and Gria-2), metabotropic glutamate receptor 8 (Grm8), glutamine transporter (Slc38a1) or the subunits  $\beta 2$  and  $\gamma 1$  of the gamma-aminobutyric acid A receptor (Figure 11A). These results suggest that glutamate signaling and metabolism is altered in diabetic mice.

Interestingly, we have also found that some mitochondrial genes, most of them encoding for proteins of the respiratory chain, were mildly increased in retinas of diabetic mice (Figure 11B). A

parallel increase in the expression of *UCP2*, a protein involved in the control of mitochondria-derived reactive oxygen species (ROS) production, was observed (Figure 11B).

## Discussion

Neurodegeneration is an early event and plays a crucial role in the pathogenesis of DR. In fact, the main features of retinal neurodegeneration (apoptosis and glial activation) have been found in the retina of diabetic donors without any microcirculatory abnormalities appearing in the ophthalmologic examinations performed during the year before death [6,29]. In addition, there are several pieces of evidence to suggest that neurodegeneration participates in early microvascular abnormalities that occur in DR [9–11,13,15,30–32]. In this regard, blood-retinal barrier (BRB) breakdown as the result of VEGF upregulation produced by glutamate-induced excitotoxicity has been well documented [9,11,12], and a cross-talk between neurodegeneration and vasoregression has been reported [10,13]. In addition, the impairment of neurovascular coupling which can be detected in diabetic patients without structural abnormalities [32,33] seems primarily mediated by ganglion cell damage [34]. Finally, it has been shown that a delayed multifocal ERG implicit time predicts the development of early microvascular abnormalities [29,35–37]. Therefore, it is reasonable to hypothesize that therapeutic strategies based on neuroprotection will be effective in preventing or arresting DR development. However, the morphological and functional characterization of neurodegeneration in a spontaneous diabetic model is a challenge that had to be met. In the present study we have evaluated the neurodegenerative process in retinas of db/db mice and we have found the same features that occur in retinas from diabetic donors. These findings permit us to propose the db/db mouse as a good model for DR and appropriate for testing neuroprotective drugs.

Mice are more resistant to the STZ effect and present a lower degree of retinal lesions compared to rats. Nevertheless, because of its great potential for genetic manipulation, the mouse offers a unique opportunity to study the molecular pathways involved in disease development. In the present study we have found that the spontaneous development of diabetes in db/db mice results in a progressive thickening of the neuroretina in comparison with non-diabetic mice, mainly due to the apoptosis of the ganglion cell layer (GCL). In this regard, we found a 24% reduction in the number of cell bodies in the GCL at 8 weeks (after 4 weeks of hyperglycemia). This reduction increased at 16 weeks to 29%. These results are in agreement with those recently reported by Tang et al [22] showing that ganglion cell number and total retinal thickness are decreased in db/db mice compared with wild-type controls. In addition, it should be mentioned that, as occurs in db/db mice, GCL has been the layer with the highest rate of apoptosis in human retinas [6,7,38]. Noteworthy, thinning of the GCL has been found in diabetic patients with no or only minimal DR [6,39–41]. Apart from the loss of cells in the GCL we also found a thinning of the ONL in db/db mice, which had already been found at 8 weeks. In this regard we demonstrated DNA nuclear fragmentation in photoreceptors by using transmission electron microscopy, thus clearly indicating the presence of apoptosis. This finding is consistent with the impairment of a-wave observed in the ERG studies.

Neural apoptosis is accompanied by changes in both types of glial cells (microglia and macroglia), the most representative being those occurring in Müller cells, the predominant type of macroglial cells. Retinal astrocytes normally express GFAP, while in Müller cells this expression is much lower. However, in diabetes

an aberrant overexpression of GFAP is shown by Müller cells [42]. Cheung et al [19] have previously reported that GFAP and cleaved caspase 3 labeling were increased in the retina of db/db mice compared with non-diabetic controls. In the present study we have found a significant overexpression of GFAP at 8 weeks, thus running in parallel with the apoptotic changes. This is a significant feature that has not been found in other spontaneous diabetic mice such as the *Ins2<sup>Akita</sup>* mouse model [43].

In order to explore whether neurodegeneration detected in homozygous db/db animals is of a genetic nature or related to hyperglycemia we examined the effect of lowering blood glucose levels on retinal neurodegeneration. We found a significant reduction of the most important features of neurodegeneration (apoptosis, glial activation, ERG abnormalities) by lowering blood glucose levels in db/db mice. Therefore, diabetes is the main reason accounting for the retinal neurodegeneration that occurs in db/db mice.

It is possible that glial activation is a consequence of neural death. In fact we have recently found the activation of the Fas/FasL death receptor pathway in the diabetic eye which can induce the secretion of pro-inflammatory cytokines, thus leading to neuroinflammation and glial activation [44]. On the other hand, Müller cells produce factors capable of modulating blood flow, vascular permeability, and cell survival. Therefore, these cells could play a primary role in accounting for neural death. Further studies to unravel the hierarchical role of apoptosis and glial activation in the neurodegenerative process of DR are needed.

We have also examined the functional consequences of retinal neurodegeneration by means of sequential ERG. The abnormalities here reported in db/db mice in b-wave and OPs (reduced amplitude and prolonged implicit time) were similar to those described in the early stages of DR in diabetic patients [45,46]. The type of ERG abnormality could help to identify anatomically the location of retinal damage. In this regard, the OPs have been shown to be derived from the inner plexiform layers involving the axon terminals of the bipolar cells, the processes of the amacrine cells, and the dendrites of the ganglion cells [47]. By contrast, changes in b-wave amplitudes and implicit times are consistent with defects in the mid-retinal layer.

Nevertheless, ERG abnormalities in the diabetic retina are not only due to apoptosis of retinal neurons. In this regard, both glial activation and changes in blood glucose levels have been involved in the ERG abnormalities observed in diabetic patients without cellular loss or major structural damage [48,49].

In the present study we found a progressive increase of glutamate accumulation in diabetic mice. Glutamate accumulation in extracellular space and the overactivation of glutamate receptors (“excitotoxicity”) plays an important role in retinal neurodegeneration. In fact, elevated levels of glutamate in the retina have been found in experimental models of diabetes [50–52], as well as in the vitreous fluid of diabetic patients [53]. Glutamate transporters are essential for keeping the extracellular glutamate concentration below neurotoxic levels [54]. In this regard, the glial GLAST, the main glutamate transporter expressed by Müller cells, is the most dominant glutamate transporter, accounting for at least 50% of glutamate uptake in the mammalian retina [55]. A reduction of GLAST expression in rat retinas with diabetes induced by STZ has been reported [56,57]. However, to the best of our knowledge GLAST expression in db/db mice mouse has not previously been examined. We observed a significant reduction of GLAST in diabetic (db/db) mice in comparison with non-diabetic (db/+) mice. This finding could contribute to the glutamate accumulation that leads to neurodegeneration in db/db mice. It is worth



mentioning that we did not find any differences in GLAST mRNA levels between diabetic and non-diabetic mice, thus suggesting that the differences in GLAST could be attributed to post-translational changes.

To the best of our knowledge this is the first transcriptomic analysis performed in the db/db model. We found a downregulation of several genes related to glutamate metabolism (glutamate receptors and glutamate transporters) in early stages of DR in db/db mouse. This finding could lead to the observed extracellular glutamate accumulation, thus inducing excitotoxicity. As previously commented, it has been reported that diabetes downregulates genes implicated in glutamate transporter in animal models. However, the information on genes related to glutamate receptors is controversial and mainly focused in STZ-diabetes induced animal models [58–61]. Furthermore, we found a simultaneously upregulation of mitochondrial UCP2 that could be contemplated as a mechanism to mitigate oxidative stress. This

finding links glutamate excitotoxicity and oxidative stress and suggests that a vicious cycle involving glutamate excitotoxicity, oxidative stress and mitochondrial dynamics reported in a non-diabetic model of retinal neurodegeneration could also be applied to diabetic retina [62–65].

In conclusion, the db/db mouse reproduces the features of the neurodegenerative process that occurs in the human diabetic eye. Therefore, it seems an appropriate model for investigating the underlying mechanisms of diabetes-induced retinal neurodegeneration and for testing new neuroprotective drugs.

## Author Contributions

Conceived and designed the experiments: PB LC RS CH. Performed the experiments: PB LC JV AC JG DR JR. Analyzed the data: PB LC JV RS CH DR JR. Contributed reagents/materials/analysis tools: JG RS CH JR. Wrote the paper: PB RS CH.

## References

- Cheung N, Mitchell P, Wong TY (2010) Diabetic retinopathy. *Lancet* 376: 124–136.
- Simó R, Hernández C (2009) Advances in the medical treatment of diabetic retinopathy. *Diabetes Care* 32: 1556–1562.
- Simó R, Hernández C (2008) Intravitreal anti-VEGF for diabetic retinopathy: hopes and fears for a new therapeutic strategy. *Diabetologia* 51: 1574–1580.
- Antonetti DA, Barber AJ, Bronson SK, Freeman WM, Gardner TW, et al. (2006) JDRF Diabetic Retinopathy Center Group. Diabetic retinopathy: seeing beyond glucose-induced microvascular disease. *Diabetes* 55: 2401–2411.
- Fletcher EL, Phipps JA, Ward MM, Puthussery T, Wilkinson-Berka JL (2007) Neuronal and glial cell abnormality as predictors of progression of diabetic retinopathy. *Curr Pharm Des* 13: 2699–2712.
- Carrasco E, Hernandez C, Miralles A, Huguet P, Farres J, et al. (2007) Lower somatostatin expression is an early event in diabetic retinopathy and is associated with retinal neurodegeneration. *Diabetes Care* 30: 2902–2908.
- Barber AJ, Gardner TW, Abcouer SF (2011) The significance of vascular and neural apoptosis to the pathology of diabetic retinopathy. *Invest Ophthalmol Vis Sci* 52: 1156–1163.
- Antonetti DA, Klein R, Gardner TW (2012) Diabetic Retinopathy. *New Engl J Med* 366: 1227–1239.
- Kusari J, Zhou S, Padillo E, Clarke KG, Gil DW (2007) Effect of memantine on neuroretinal function and retinal vascular changes of streptozotocin-induced diabetic rats. *Invest Ophthalmol Vis Sci* 48: 5152–5159.
- Feng Y, Wang Y, Stock O, Pfister F, Tanimoto N, et al. (2009) Vasoregression linked to neuronal damage in the rat with defect of polycystin-2. *PLoS One* 4: e7328.
- Kusari J, Zhou S, Padillo E, Clarke KG, Gil DW (2010) Inhibition of vitreoretinal VEGF elevation and blood-retinal barrier breakdown in streptozotocin-induced diabetic rats by brimonidine. *Invest Ophthalmol Vis Sci* 51: 1044–1051.
- Cervantes-Villagrana AR, Garcia-Román, González-Espinosa C, Lamas M (2010) Pharmacological inhibition of N-methyl D-aspartate receptor promotes secretion of vascular endothelial growth factor in Müller cells: effects of hyperglycemia and hypoxia. *Curr Eye Res* 35: 733–741.
- Feng Y, Wang Y, Li L, Wu L, Hoffmann S, et al. (2011) Gene expression profiling of vasoregression in the retina-involvement of microglial cells. *PLoS One* 6: e16865.
- Imai H, Singh RS, Fort PE, Gardner TW (2009) Neuroprotection for diabetic retinopathy. *Dev Ophthalmol* 44: 56–68.
- Simó R, Hernández C, European Consortium for the Early Treatment of Diabetic Retinopathy (EUROCONDOR) (2012) Neurodegeneration is an early event in diabetic retinopathy: therapeutic implications. *Br J Ophthalmol* 96: 1285–1290.
- Phipps JA, Fletcher EL, Vingrys AJ (2004) Paired-flash identification of rod and cone dysfunction in the diabetic rat. *Invest Ophthalmol Vis Sci* 45: 4592–4600.
- Robinson R, Barathi VA, Chaurasia SS, Wong TY, Kern TS (2012) Update on animal models of diabetic retinopathy: from molecular approaches to mice and higher mammals. *Dis Model Mech* 5: 444–456.
- Clements RS Jr, Robison WG Jr, Cohen MP (1998) Anti-glycated albumin therapy ameliorates early retinal microvascular pathology in db/db mice. *J Diabetes Complications* 12: 28–33.
- Cheung AK, Fung MK, Lo AC, Lam TT, So KF, et al. (2005) Aldose reductase deficiency prevents diabetes-induced blood-retinal barrier breakdown, apoptosis, and glial reactivation in the retina of db/db mice. *Diabetes* 54: 3119–3125.
- Li J, Wang JJ, Chen D, Mott R, Yu Q, et al. (2009) Systemic administration of HMG-CoA reductase inhibitor protects the blood-retinal barrier and ameliorates retinal inflammation in type 2 diabetes. *Exp Eye Res* 89: 71–78.
- Li J, Wang JJ, Yu Q, Chen K, Mahadev K, et al. (2010) Inhibition of reactive oxygen species by Lovastatin downregulates vascular endothelial growth factor expression and ameliorates blood-retinal barrier breakdown in db/db mice: role of NADPH oxidase 4. *Diabetes* 59: 1528–1538.
- Tang L, Zhang Y, Jiang Y, Willard L, Ortiz E, et al. (2011) Dietary wolfberry ameliorates retinal structure abnormalities in db/db mice at the early stage of diabetes. *Exp Biol Med* (Maywood) 236: 1051–1063.
- Xiao C, He M, Nan Y, Zhang D, Chen B, et al. (2012) Physiological effects of superoxide dismutase on altered visual function of retinal ganglion cells in db/db mice. *PLoS One* 7: e30343.
- Marmor MF, Holder GE, Seeliger MW, Yamamoto S, International Society for Clinical Electrophysiology of Vision (2004). Standard for clinical electroretinography. *Doc Ophthalmol* 108: 107–114.
- Anderson PJ, Watts H, Hille C, Philpott K, Clark P, et al. (2008) Glial and endothelial blood-retinal barrier responses to amyloid-beta in the neural retina of the rat. *Clin Ophthalmol* 2: 801–816.
- Livak KL, Schmittgen TD (2001) Analysis of Relative Gene Expression Data Using Real-Time Quantitative PCR and the 2<sup>-ΔΔC<sub>T</sub></sup>. *Methods*, 25: 408–411.
- Bayer AU, Neuhardt T, May AC, Martus P, Maag KP, et al. (2001) Retinal morphology and ERG response in the DBA/2Nnia mouse model of angle-closure glaucoma. *Invest Ophthalmol Vis Sci* 42: 1258–1265.
- Schmucker C, Schaeffel F (2004) A paraxial schematic eye model for the growing C57BL/6 mouse. *Vision Res* 44: 1857–1867.
- García-Ramírez M, Hernández C, Villarroel M, Canals F, Alonso MA, et al. (2009) Interphotoreceptor retinoid-binding protein (IRBP) is downregulated at early stages of diabetic retinopathy. *Diabetologia* 52: 2633–2641.
- Harrison WW, Bearn MA, Ng J, Jewell NP, Barez S, et al. (2011) Multifocal electroretinograms predict onset of diabetic retinopathy in adult patients with diabetes. *Invest Ophthalmol Vis Sci* 52: 772–777.
- Ng JS, Bearn MA Jr, Schneck ME, Barez S, Adams AJ (2008) Local diabetic retinopathy prediction by multifocal ERG delays over 3 years. *Invest Ophthalmol Vis Sci* 49: 1622–1628.
- Leclaire-Collet A, Audo I, Aout M, Girmens JF, Sofroni R, et al. (2011) Evaluation of retinal function flicker light-induced retinal vascular response in normotensive patients with diabetes without retinopathy. *Invest Ophthalmol Vis Sci* 52: 2861–2867.
- Tyberg M, Lindblad U, Melander A, Lövestam-Adrian M, Ponjavic V, et al. (2011) Electrophysiological studies in newly onset type 2 diabetes without visible vascular retinopathy. *Doc Ophthalmol* 123: 193–198.
- Riva CE, Logean E, Falsini B (2005) Visually evoked hemodynamical response and assessment of neurovascular coupling in the optic nerve and retina. *Prog Retin Eye Res* 24: 183–215.
- Bearn MA Jr, Adams AJ, Han Y, Schneck ME, Ng J, et al. (2006) A multifocal electroretinogram model predicting the development of diabetic retinopathy. *Prog Retin Eye Res* 25: 425–448.
- Bronson-Castain KW, Bearn MA Jr, Neuville J, Jonasdottir S, King-Hooper B, et al. (2009) Adolescents with Type 2 diabetes: early indications of focal retinal neuropathy, retinal thinning, and venular dilation. *Retina* 29: 618–626.
- Han Y, Schneck ME, Bearn MA Jr, Barez S, Jacobsen CH, et al. (2004) Formulation and evaluation of a predictive model to identify the sites of future diabetic retinopathy. *Invest Ophthalmol Vis Sci* 45: 4106–4112.
- Kern TS, Barber AJ (2008) Retinal ganglion cells in diabetes. *J Physiol* 586: 4401–4408.
- Lopes de Faria JM, Russ H, Costa VP (2002) Retinal nerve fibre layer loss in patients with type 1 diabetes mellitus without retinopathy. *Br J Ophthalmol* 86: 725–728.
- van Dijk HW, Verbraak FD, Stehouwer M, Kok PH, Garvin MK, et al. (2011) Association of visual function and ganglion cell layer thickness in patients with

- diabetes mellitus type 1 and no or minimal diabetic retinopathy. *Vision Res* 28: 224–228.
41. van Dijk HW, Verbraak FD, Kok PH, Stehouwer M, Garvin MK, et al. (2012) Early neurodegeneration in the retina of type 2 diabetic patients. *Invest Ophthalmol Vis Sci* 53: 2715–2719.
  42. Mizutani M, Gerhardinger C, Lorenzi M (1998) Müller cell changes in human diabetic retinopathy. *Diabetes* 47: 445–449.
  43. Barber AJ, Antonetti DA, Kern TS, Reiter CEN, Soans RS, et al. (2005) The *Ins2<sup>Akita</sup>* mouse as a model of early complications in diabetes. *Invest Ophthalmol Vis Sci* 46: 2210–2218.
  44. Valverde AM, Miranda S, García-Ramírez M, González-Rodríguez A, Hernández C, et al. (2013) Pro-apoptotic and survival signaling in the neuroretina at early stages of diabetic retinopathy. *Mol Vis* 19: 47–53.
  45. Holopigian K, Seiple W, Lorenzo M, Carr R (1992) A comparison of photopic and scotopic electroretinographic changes in early diabetic retinopathy. *Invest Ophthalmol Vis Sci* 33: 2773–2780.
  46. Shirao Y, Kawasaki K (1998) Electrical responses from diabetic retina. *Prog Retin Eye Res* 17: 59–76.
  47. Wachtmeister L (1987) Basic research and clinical aspects of the oscillatory potentials of the electroretinogram. *Doc Ophthalmol* 66: 187–194.
  48. Kline RP, Ripps H, Dowling JE (1978) Generation of b-wave currents in the skate retina. *Proc Natl Acad Sci USA* 75: 5727–5731.
  49. Klemp K, Sander B, Brockhoff PB, Vaag A, Lund-Andersen H, et al. (2005) The multifocal ERG in diabetic patients without retinopathy during euglycemic clamping. *Invest Ophthalmol Vis Sci* 46: 2620–2626.
  50. Lieth E, Barber AJ, Xu B, Dice C, Ratz MJ, et al. (1988) Glial reactivity and impaired glutamate metabolism in short-term experimental diabetic retinopathy. *Penn State Retina Research Group. Diabetes* 47: 815–820.
  51. Lieth E, LaNoue KF, Antonetti DA, Ratz M (2000) Diabetes reduces glutamate oxidation and glutamine synthesis in the retina. *The Penn State Retina Research Group. Exp Eye* 70: 723–730.
  52. Kowluru RA, Engerman RL, Case GL, Kern TS (2001) Retinal glutamate in diabetes and effect of antioxidants. *Neurochem Int* 38: 385–390.
  53. Ambati J, Chalam KV, Chawla DK, D'Angio CT, Guillet EG, et al. (1997) Elevated gamma-aminobutyric acid, glutamate, and vascular endothelial growth factor levels in the vitreous of patients with proliferative diabetic retinopathy. *Arch Ophthalmol* 115: 1161–1166.
  54. Barnstable CJ (1993) Glutamate and GABA in retinal circuitry. *Curr Opin Neurobiol* 3: 520–525.
  55. Sarthy VP, Pignataro L, Pannicke T, Weick M, Reichenbach A, et al. (2005) Glutamate transport by retinal Müller cells in glutamate/aspartate transporter-knockout mice. *Glia* 49: 184–196.
  56. Hernández C, García-Ramírez M, Corraliza L, Fernández-Carneado J, Farrera-Sinfreu J, et al. (2013) Topical administration of somatostatin prevents retinal neurodegeneration in experimental diabetes. *Diabetes* 62: 2569–78.
  57. Zhang Y, Zhang J, Wang Q, Lei X, Chu Q, et al. (2011) Intravitreal injection of exendin-4 analogue protects retinal cells in early diabetic rats. *Invest Ophthalmol Vis Sci* 52: 278–285.
  58. Ng YK, Zeng XX, Ling EA (2004) Expression of glutamate receptors and calcium-binding proteins in the retina of streptozotocin-induced diabetic rats. *Brain Res* 1018: 66–72.
  59. Santiago AR, Gaspar JM, Baptista FI, Cristóvão AJ, Santos PF, et al. (2009) Diabetes changes the levels of ionotropic glutamate receptors in the rat retina. *Mol Vis* 15: 1620–1630.
  60. Lau JC, Kroes RA, Moskal JR, Linsenmeier RA (2013) Diabetes changes expression of genes related to glutamate neurotransmission and transport in the Long-Evans rat retina. *Mol Vis* 19: 1538–1553.
  61. Silva KC, Rosales MA, Hamassaki DE, Saito KC, Faria AM, et al. (2013) Green tea is neuroprotective in diabetic retinopathy. *Invest Ophthalmol Vis Sci* 54: 1325–1336.
  62. Ju WK, Kim KY, Angert M, Duong-Polk KX, Lindsey JD, et al. (2009) Memantine blocks mitochondrial OPA1 and cytochrome c release and subsequent apoptotic cell death in glaucomatous retina. *Invest Ophthalmol Vis Sci* 50: 707–716.
  63. Ju WK, Lindsey JD, Angert M, Patel A, Weinreb RN (2008) Glutamate receptor activation triggers OPA1 release and induces apoptotic cell death in ischemic rat retina. *Mol Vis* 14: 2629–2638.
  64. Markowitz AJ, White MG, Kolson DL, Jordan-Sciutto KL (2007) Cellular interplay between neurons and glia: toward a comprehensive mechanism for excitotoxic neuronal loss in neurodegeneration. *Cellscience* 4: 111–146.
  65. Nguyen D, Alavi MV, Kim KY, Kang T, Scott RT, et al. (2011) A new vicious cycle involving glutamate excitotoxicity, oxidative stress and mitochondrial dynamics. *Cell Death Dis* 8:2: e240.
